# Supplementary material for: The last man standing is the most resistant: eliminating artemisinin-resistant malaria in Cambodia
Source: PubMed Central journal article supplement (PMC2660356; doi:10.1186/1475-2875-8-31), 2009-02-20
Supplement: 1475-2875-8-31-S2.pdf [file 1475-2875-8-31-S2.pdf]

## **Full Model Code**

The model used in this paper was created using a software package called Berkeley Madonna™. (Berkeley Madonna™ can be downloaded as a free trial version at <http://www.berkeleymadonna.com/download.html>)

Below is the full Berkeley Madonna™ code for the model.

In order to run the model, the following steps should be followed:

- 1) Replace the terms  $\beta$ ,  $\gamma$ ,  $\delta$ ,  $\mu$ ,  $\pi$ ,  $\rho$ ,  $\sigma$  and  $\tau$  with their names e.g. beta, gamma, etc.
- 2) Cut and paste the entire code into the Equations window of Berkeley Madonna™
- 3) Run the code with  $T_{BI}$  (total number of blood stage infections),  $N_{ra}$  (number of infections resistant to artesunate) and  $perc_{ra}$  (percentage of infections resistant to artesunate) displayed in the Graph window
- 4) Use the parameter sliders to alter parameter values to explore their effects on the results

```
STARTTIME = 1960
STOPTIME=2050
DT = 0.0027
```

```
;Model to examine the effect of elimination interventions on artesunate resistance in Western Cambodia
;Dr Richard Maude 27/11/08
```

```
;All times are in years
;Artesunate monotherapy begins in 1975
;Artesunate resistance first arises in 1980
;Interventions begin in 2009
```

```
;NOTATION
;N = total population size (N = S+L+B+I)
;t = time for drug to clear sensitive infection
;c = clearance rate of infection by drug according to drug sensitivity
;S = susceptible people
;L = liver stage infections
;B = noninfectious blood stage infections
;T = total
;I = infectious blood stage infections
;r = resistant to...
;d = drug given
;o = no drug
;a = artesunate
;ai = artesunate as part of ACT
```

;b = piperazine  
;ab = ACT (dihydroartemisinin plus piperazine)  
;p = primaquine

;e.g.1  $t_{Bda}$  = time for artesunate to clear noninfectious blood stage infection  
;e.g.2  $c_{Bradab}$  = clearance rate (c) of noninfectious blood stage infections (B) resistant to artesunate (ra) by ACT (dab)  
;e.g.3  $c_{Irodp}$  = clearance rate (c) of infectious blood stage infections (I) resistant to no drugs i.e. sensitive to all (ro) by primaquine (dp)

;i<sub>0</sub> = no intervention  
;i<sub>1</sub> = mass drug administration (MDA) (Intervention 1)  
;i<sub>1a</sub> = treatment of symptomatic patients who have already received MDA  
;i<sub>2</sub> = mass screen and treat (MSAT) with atovaquone/proguanil (Intervention 2)  
;i<sub>3</sub> = MSAT with ACT (Intervention 3)

;e.g.4  $d_{ai1a}$  = treatment of symptomatic patients with artesunate monotherapy ( $d_a$ ) who have already received MDA  
;e.g.5  $d_{abi1a}$  = treatment of symptomatic patients with ACT who have already received MDA  
;X = effective duration of drug action  
;e.g.6  $X_{ai}$  = effective duration of artesunate as part of ACT

;e = relative effectiveness of drug against drug resistant infections vs drug sensitive infections  
;bn = bed nets  
;dur = duration

## ;PARAMETERS

;Population parameters  
 $\mu = 0.015$  ; i.e. birth rate & death rate  
 $N_0 = 3200000$  ; total population at time=0  
 $I_0 = N_0 * p_{inf}$  ; total infected at time=0

;Natural history of infection  
 $\gamma = 365/5$  ; rate of liver stage becoming noninfectious blood stage  
 $\sigma = 365/15$  ; rate of developing gametocytes  
 $\delta = 365/60$  ; natural recovery rate of infectious

;Drug action

;Time for drug to clear drug sensitive infection in days

$t_{Bda} = 7$  ; time for artesunate to clear B  
 $t_{Ida} = 4$  ; time for artesunate to clear I  
 $t_{Bdb} = 3$  ; time for clearance of noninfectious blood stage by piperazine  
 $t_{Idb} = 21$  ; time for clearance of infectious blood stage by piperazine  
 $t_{Bdab} = 3$  ; time for ACT to clear B = 3 days if synergy or 7 days if none  
 $t_{Idab} = 3$  ; time for ACT to clear I = 3 days if synergy or 4 days if none  
 $t_{Ldvg} = 3$  ; time for clearance of liver stage by atovaquone/proguanil  
 $t_{Bdvg} = 3$  ; time for clearance of noninfectious blood stage by atovaquone/proguanil  
 $t_{Idvg} = 4.5$  ; time for clearance of infectious blood stage by atovaquone/proguanil  
 $t_{Ldv} = 6$  ; time for clearance of liver stage by atovaquone  
 $t_{Bdv} = 3$  ; time for clearance of noninfectious blood stage by atovaquone  
 $t_{Idv} = 4.5$  ; time for clearance of infectious blood stage by atovaquone  
 $t_{Ldp} = 7$  ; time for clearance of liver stage by primaquine  
 $t_{Idp} = 1$  ; time for clearance of infectious blood stage by primaquine

;rate of clearance of infection by drug according to drug sensitivity

$c_{Brodo} = 0$  ; rate of clearance of sensitive noninfectious blood stage by no drug  
 $c_{Brado} = 0$  ; rate of clearance of artesunate resistant noninfectious blood stage by no drug  
 $c_{Brbdo} = 0$  ; rate of clearance of piperazine resistant noninfectious blood stage by no drug  
 $c_{Irodo} = 0$  ; rate of clearance of sensitive infectious blood stage by no drug  
 $c_{Irado} = 0$  ; rate of clearance of artesunate resistant infectious blood stage by no drug  
 $c_{Irbdo} = 0$  ; rate of clearance of piperazine resistant infectious blood stage by no drug  
 $c_{Broda} = 365/t_{Bda}$  ; rate of clearance of blood stage resistant to none treated with artesunate  
 $c_{Brada} = e_{rada} * c_{Broda}$  ; rate of clearance of blood stage resistant to artesunate treated with artesunate  
 $c_{Brbda} = 365/t_{Bda}$  ; rate of clearance of blood stage resistant to piperazine treated with artesunate  
 $c_{Iroda} = 365/t_{Ida}$  ; rate of clearance of I resistant to none treated with artesunate  
 $c_{Irada} = e_{rada} * c_{Iroda}$  ; rate of clearance of I resistant to artesunate treated with artesunate  
 $c_{Irbda} = 365/t_{Ida}$  ; rate of clearance of I resistant to piperazine treated with artesunate  
 $c_{Brodab} = 365/t_{Bdab}$  ; rate of clearance of B resistant to none treated by ACT  
 $c_{Bradab} = e_{rada} * 365/t_{Bdab} + (1 - e_{rada}) * 365/t_{Bdb}$  ; rate of clearance of artesunate resistant noninfectious blood stage by ACT  
 $c_{Brbdab} = e_{rdbd} * 365/t_{Bdab} + (1 - e_{rdbd}) * 365/t_{Bda}$  ; rate of clearance of piperazine resistant noninfectious blood stage by ACT  
 $c_{Irodab} = 365/t_{Idab}$  ; rate of clearance of sensitive infectious blood stage by ACT  
 $c_{Iradab} = e_{rada} * 365/t_{Idab} + (1 - e_{rada}) * 365/t_{Idb}$  ; rate of clearance of artesunate resistant infectious blood stage by ACT  
 $c_{Irbdab} = e_{rdbd} * 365/t_{Idab} + (1 - e_{rdbd}) * 365/t_{Ida}$  ; rate of clearance of piperazine resistant infectious blood stage by ACT  
 $c_{Brodb} = 365/t_{Bdb}$  ; rate of clearance of sensitive noninfectious blood stage treated with piperazine (after artesunate i.e. minus 3 days)  
 $c_{Bradb} = 365/t_{Bdb}$  ; rate of clearance of artesunate resistant noninfectious blood stage treated with piperazine  
 $c_{Brbdb} = e_{rdbd} * 365/t_{Bdb}$  ; rate of clearance of piperazine resistant noninfectious blood stage treated with piperazine  
 $c_{Irodb} = 365/t_{Idb}$  ; rate of clearance of sensitive infectious blood stage treated with piperazine

$c_{lradb} = 365/t_{ldb}$  ; rate of clearance of artesunate resistant infectious blood stage treated with piperazine

$c_{lrbdb} = e_{rbdb} * 365/t_{ldb}$  ; rate of clearance of piperazine resistant infectious blood stage treated with piperazine

$c_{Lp} = p_p * 365/t_{Ldp}$  ; rate of clearance of liver stage treated with primaquine

$c_{Ip} = p_p * 365/t_{Idp}$  ; rate of clearance of infectious blood stage treated with primaquine

$c_{Ldvg} = 365/t_{Ldvg}$  ; rate of clearance of liver stage treated with atovaquone/proguanil

$c_{Bdvg} = 365/t_{Bdvg}$  ; rate of clearance of noninfectious blood stage treated with atovaquone/proguanil

$c_{ldvg} = 365/t_{ldvg}$  ; rate of clearance of infectious blood stage treated with atovaquone/proguanil

$c_{Ldv} = 365/t_{Ldv}$  ; rate of clearance of liver stage treated with atovaquone after atovaquone/proguanil

$c_{Bdv} = 365/t_{Bdv}$  ; rate of clearance of noninfectious blood stage treated with atovaquone after atovaquone/proguanil

$c_{ldv} = 365/t_{ldv}$  ; rate of clearance of infectious blood stage treated with atovaquone after atovaquone/proguanil

;Effective duration of drug action

$X_{ao} = 7/365$  ; effective duration of artesunate monotherapy

$X_{ai} = 3/365$  ; effective duration of artesunate as part of ACT

$X_b = 20/365$  ; effective duration of piperazine

$X_g = 4/365$  ; effective duration of proguanil as part of atovaquone/proguanil

$X_v = 15/365$  ; effective duration of atovaquone

$X_p = 1/365$  ; effective duration of primaquine

;Drug resistance

$e_{rada} = (1 - prec_{ra}) * pct_{roda}/pct_{rada}$  ; relative effectiveness of artesunate against artesunate resistant infections (0-1)

$pct_{roda} = 30$  ; parasite clearance time for artesunate vs sensitive infections

$pct_{rada} = 83$  ; parasite clearance time for artesunate vs resistant infections

$prec_{ra} = 0.35$  ; proportion recrudescences in resistant infections

$e_{rbdb} = 0.8$  ; relative effectiveness of piperazine in piperazine resistant infections (0-1)

;Rates of receiving treatments

;Artesunate monotherapy

$\tau = 365/16 * propRx_a * SQUAREPULSE(start_a, dur_a)$  ; rate of starting artesunate in infected patients

$dur_a = stop_a - start_a$  ; duration availability of artesunate

$start_a = 1975$  ; time that artesunate first introduced

$stop_a = 2009$  ; time from when artesunate no longer available

;Treat symptomatic infection with ACT

$\tau_{ab} = \tau mag_{ab} * propRx_{ab} * SQUAREPULSE(start_{ab}, dur_{ab})$

$\tau mag_{ab} = 365/16$

dur<sub>ab</sub> = 41; 'long-term'  
start<sub>ab</sub> = 2009;

;Intervention 1: MDA with ACT

$\tau_{pulse_1} = \text{if mod}(\text{time}-\text{dur}\tau_1, 1) \geq 1 - \text{dur}\tau_1 \text{ then propRx}_{i_1} * \tau_{mag_{i_1}} \text{ else } 0$   
 $\tau_1 = \tau_{pulse_1} * \text{SQUAREPULSE}(2009, \text{dur}_{i_1})$   
 $\tau_{mag_{i_1}} = 4$  ; rate of starting intervention 1 in 1/years  
dur<sub>i1</sub> = 0 ; total duration of intervention 1 in years  
dur $\tau_1$  = 0.25 ; duration of each round of intervention 1 in years

;Intervention 2: MSAT with atovaquone/proguanil

$\tau_{pulse_2} = \text{if mod}(\text{time}-\text{dur}\tau_2, \text{fr}_{i_2}) \geq \text{fr}_{i_2} - \text{dur}\tau_2 \text{ then propRx}_{i_2} * \tau_{mag_{i_2}} \text{ else } 0$   
 $\tau_2 = \tau_{pulse_2} * \text{SQUAREPULSE}(2009, \text{dur}_{i_2})$   
 $\tau_{mag_{i_2}} = 4$  ; rate of starting intervention 2 in 1/years  
dur<sub>i2</sub> = 0 ; total duration of intervention 2 in years  
dur $\tau_2$  = 0.25 ; duration of each round of intervention 2 in years  
fr<sub>i2</sub> = 1/n<sub>i2</sub>; 1/frequency of intervention 2 per year  
n<sub>i2</sub> = 1; frequency of intervention 2 per year

;Intervention 3: MSAT with ACT.

;this uses the same section of code as switching treatment to ACT

; to make this run, do the following:

;1) add a ';' to the beginning of the first line of the 'treat symptomatic infection with ACT'  
section (above) to give “;  $\tau_{ab} = \tau_{mag_{ab}} * \text{propRx}_{ab} * \text{SQUAREPULSE}(\text{start}_{ab}, \text{dur}_{ab})$ ”

$\tau_{pulse_3} = \text{if mod}(\text{time}-\text{dur}\tau_3, 1) \geq 1 - \text{dur}\tau_3 \text{ then propRx}_{i_3} * \tau_{mag_{i_3}} \text{ else } 0$

;2) remove the ';' from the beginning of the line “;  $\tau_{ab} = \tau_{pulse_3} * \text{SQUAREPULSE}(2009, \text{dur}_{i_3})$ ”  
(below)

$\tau_{pulse_3} = \text{if mod}(\text{time}-\text{dur}\tau_3, 1) \geq 1 - \text{dur}\tau_3 \text{ then propRx}_{i_3} * \tau_{mag_{i_3}} \text{ else } 0$

;  $\tau_{ab} = \tau_{pulse_3} * \text{SQUAREPULSE}(2009, \text{dur}_{i_3})$

$\tau_{mag_{i_3}} = 4$  ; rate of starting intervention 3 in 1/years

dur<sub>i3</sub> = 0 ; total duration of intervention 3 in years

dur $\tau_3$  = 0.25 ; duration of each round of intervention 3 in years

;ACT for symptomatic infection during intervention 1

$\tau_{abi1} = \tau_{mag_{abi1}} * \text{propRx}_{ab} * \text{SQUAREPULSE}(\text{start}_{ab}, \text{dur}_{ab})$ ; rate of starting ACT in infected  
people during intervention 1

$\tau_{mag_{abi1}} = 365/16$

;Artesunate monotherapy for symptomatic infection during intervention 1

$\tau_{ai1} = \tau_{mag_{ai1}} * \text{propRx}_a * \text{SQUAREPULSE}(2009, \text{dur}_a)$ ; rate of starting artesunate in infected  
people during intervention 1

$\tau_{mag_{ai1}} = 365/16$

;ACT for symptomatic infection during intervention 2

$\tau_{abi2} = \tau_{mag_{abi2}} * \text{propRx}_{ab} * \text{SQUAREPULSE}(2009, \text{dur}_{ab})$ ; rate of starting ACT during intervention 2  
 $\tau_{mag_{abi2}} = 365/16$

;Artesunate monotherapy for symptomatic infection during intervention 2  
 $\tau_{ai2} = \tau_{mag_{ai2}} * \text{propRx}_a * \text{SQUAREPULSE}(2009, \text{dur}_a)$ ; rate of starting artesunate in infected people during intervention 2  
 $\tau_{mag_{ai2}} = 365/16$

;Bed nets  
 $\text{bn} = \text{bnmag} * \text{SQUAREPULSE}(2009, \text{dur}_{bn})$   
 $\text{bnmag} = 0.3$ ; transmission reduction due to bed nets  
 $\text{dur}_{bn} = 0$ ; 0 or 4 years

;Initial conditions  
 $p_a = 0$  ; proportion resistant to artesunate in 1960  
 $p_b = 0.05$  ; proportion resistant to piperazine in 1960 (and 2009)  
 $p_o = 1 - p_a - p_b$  ; proportion sensitive to artesunate and piperazine in 1960  
 $p_{BI} = 0.0743$  ; proportion infected with detectable blood stage infection in 2009 (data is from 2006)  
 $p_{inf} = 0.16$  ; proportion any malaria infection in 1960  
 $p_p = 0$  ; proportion given primaquine = 0-1

$st = 1980$  ; time that artesunate resistance first arises - this is set relatively early to maximise  $p_a$  in 2009 so near 10%  
 $mst = 350$  ;

$\text{propRx}_a = \text{propRx}_{am} * \text{prop}_a * \text{adh}_a$  ; proportion that get effective artesunate treatment for symptomatic infection = 0.052  
 $\text{propRx}_{am} = 0.63$  ; proportion receiving antimalarials  
 $\text{prop}_a = 0.4$  ; proportion of antimalarials constituting artesunate monotherapy  
 $\text{adh}_a = 0.2$  ; proportion that take full 7 day course artesunate monotherapy

$\text{propRx}_{ab} = \text{IF TIME} < 2009 \text{ THEN } 0 \text{ ELSE } p_{ab} * (\text{cov}_{ab} - \text{cov}_{ab} * \exp(-k * (\text{TIME} - 2009)))$  ; proportion that get effective ACT treatment for symptomatic infection

$\text{cov}_{ab} = 0.6$  ; maximum coverage with ACT for treatment  
 $p_{sab} = 0.85$  ; proportion of shops that sell modern drugs  
 $\text{adh}_{ab} = 0.77$  ; adherence to 3 day regime of ACT  
 $\text{adh}_{vg} = 0.77$  ; adherence to 3 day regime of atovaquone/proguanil  
 $p_{ab} = \text{cov}_{ab} * p_{sab} * \text{adh}_{ab}$  ; proportion that actually take 3 day course of ACT

$k = 30$  ; speed of introduction of intervention

$\text{propRx}_{i1} = \text{cov}_{i1} * \text{adh}_{ab}$  ; proportion that complete a 3 day course of MDA with ACT  
 $\text{propRx}_{i2} = \text{cov}_{i2} * \text{adh}_{vg}$  ; proportion that complete a 3 day course of atovaquone/proguanil during MSAT  
 $\text{propRx}_{i3} = \text{cov}_{i3} * \text{adh}_{ab}$  ; proportion that complete a 3 day course of ACT during MSAT  
 $\text{cov}_{i1} = 0.8$  ; coverage with intervention 1  
 $\text{cov}_{i2} = 0.8$  ; coverage with intervention 2  
 $\text{cov}_{i3} = 0.8$  ; coverage with intervention 3

;Calculate intial conditions

ROOTI  $\beta_n = \mu * N_0 - \beta_n * (\text{p}_{inf} * N_0) * S_{\text{rodoio1}} / N_0 + \delta * (\text{p}_{inf} * N_0) - \mu * S_{\text{rodoio1}}$   
 ROOTI  $S_{\text{rodoio1}} = \beta_n * (\text{p}_{inf} * N_0) * S_{\text{rodoio1}} / N_0 - (\gamma + \mu) * L_{\text{rodoio1}}$   
 ROOTI  $L_{\text{rodoio1}} = \gamma * L_{\text{rodoio1}} - (\sigma + \mu) * B_{\text{rodoio1}}$   
 ROOTI  $B_{\text{rodoio1}} = \sigma * B_{\text{rodoio1}} - (\delta + \mu) * (\text{p}_{inf} * N_0)$

GUESS  $\beta_n = 10$   
 LIMIT  $\beta_n \geq 0$   
 LIMIT  $\beta_n \leq 1000$

GUESS  $S_{\text{rodoio1}} = 2.1e+6$   
 LIMIT  $S_{\text{rodoio1}} \geq 0$   
 LIMIT  $S_{\text{rodoio1}} \leq N_0$

GUESS  $L_{\text{rodoio1}} = 7e+4$   
 LIMIT  $L_{\text{rodoio1}} \geq 0$   
 LIMIT  $L_{\text{rodoio1}} \leq N_0$

GUESS  $B_{\text{rodoio1}} = 2e+5$   
 LIMIT  $B_{\text{rodoio1}} \geq 0$   
 LIMIT  $B_{\text{rodoio1}} \leq N_0$

;MODEL

;Treatment with artesunate monotherapy  
 ; $N_{\text{doio}}$  and  $N_{\text{daio}}$

;Box  $N_{\text{doio}}$

init  $S_{\text{doio}} = S_{\text{rodoio1}}$   
 $I_{\text{doio0}} = N_0 * \text{p}_{inf}$

$$L_{doio} = L_{rodoio} + L_{radoio} + L_{rbdoio}$$

$$B_{doio} = B_{rodoio} + B_{radoio} + B_{rbdoio}$$

$$I_{doio} = I_{rodoio} + I_{radoio} + I_{rbdoio}$$

$$\text{init } L_{rodoio} = L_{rodoio1}$$

$$\text{init } L_{radoio} = 0$$

$$\text{init } L_{rbdoio} = 0$$

$$\text{init } B_{rodoio} = B_{rodoio1}$$

$$\text{init } B_{radoio} = 0$$

$$\text{init } B_{rbdoio} = 0$$

$$\text{init } I_{rodoio} = p_o * I_{doio0}$$

$$\text{init } I_{radoio} = p_a * I_{doio0}$$

$$\text{init } I_{rbdoio} = p_b * I_{doio0}$$

;S<sub>doio</sub>

; Example of code for stochasticity  $S_{doio}(t+dt) = \max(\text{poisson}(S_{doio} + (\mu * N_0 - \mu * S_{doio} - \beta * S_{doio} * T_{Iro}/N_0 + \delta * I_{rodoio} + c_{Brodo} * B_{rodoio} + c_{Irodo} * I_{rodoio} - \beta * S_{doio} * T_{Ira}/N_0 + \delta * I_{radoio} + c_{Brodo} * B_{radoio} + c_{Irado} * I_{radoio} - \beta * S_{doio} * T_{Irb}/N_0 + \delta * I_{rbdoio} + c_{Brbdo} * B_{rbdoio} + c_{Irbdo} * I_{rbdoio} + (1/X_{ao}) * S_{daio} - \tau_1 * S_{doio} + (1/(X_b - X_{ai})) * S_{dbio}) * dt, 0)$

; this form of code was substituted for every differential equation in the model to achieve stochasticity

$$d/dt(S_{doio}) = \mu * N_0 - \mu * S_{doio} - \beta * S_{doio} * T_{Iro}/N_0 + \delta * I_{rodoio} + c_{Brodo} * B_{rodoio} + c_{Irodo} * I_{rodoio} - \beta * S_{doio} * T_{Ira}/N_0 + \delta * I_{radoio} + c_{Brodo} * B_{radoio} + c_{Irado} * I_{radoio} - \beta * S_{doio} * T_{Irb}/N_0 + \delta * I_{rbdoio} + c_{Brbdo} * B_{rbdoio} + c_{Irbdo} * I_{rbdoio} + (1/X_{ao}) * S_{daio} - \tau_1 * S_{doio} + (1/(X_b - X_{ai})) * S_{dbio}$$

;rodoio

$$d/dt(L_{rodoio}) = \beta * S_{doio} * T_{Iro}/N_0 - (\mu + \gamma) * L_{rodoio} + (1/X_{ao}) * L_{rodaio} - \tau_1 * L_{rodoio} + (1/(X_b - X_{ai})) * L_{rodbio}$$

$$d/dt(B_{rodoio}) = \gamma * L_{rodoio} - (\mu + \sigma) * B_{rodoio} - c_{Brodo} * B_{rodoio} - \tau * B_{rodoio} + (1/X_{ao}) * B_{rodaio} - \tau_1 * B_{rodoio} - \tau_2 * B_{rodoio} - \tau_{ab} * B_{rodoio} + (1/(X_b - X_{ai})) * B_{rodbio}$$

$$d/dt(I_{rodoio}) = \sigma * B_{rodoio} - (\mu + \delta) * I_{rodoio} - c_{Irodo} * I_{rodoio} - \tau * I_{rodoio} + (1/X_{ao}) * I_{rodaio} - \tau_1 * I_{rodoio} - \tau_2 * I_{rodoio} - \tau_{ab} * I_{rodoio} + (1/(X_b - X_{ai})) * I_{rodbio}$$

;radoio

$$d/dt(L_{radoio}) = \beta * S_{doio} * T_{Ira}/N_0 - (\mu + \gamma) * L_{radoio} + (1/X_{ao}) * L_{radaio} - \tau_1 * L_{radoio} + (1/(X_b - X_{ai})) * L_{radbio}$$

$$d/dt(B_{radoio}) = \gamma * L_{radoio} - (\mu + \sigma) * B_{radoio} - c_{Brodo} * B_{radoio} - \tau * B_{radoio} + (1/X_{ao}) * B_{radaio} - \tau_1 * B_{radoio} - \tau_2 * B_{radoio} - \tau_{ab} * B_{radoio} + (1/(X_b - X_{ai})) * B_{radbio}$$

$$d/dt(I_{radoio}) = \sigma * B_{radoio} - (\mu + \delta) * I_{radoio} - c_{Irado} * I_{radoio} - \tau * I_{radoio} + (1/X_{ao}) * I_{radaio} - \tau_1 * I_{radoio} - \tau_2 * I_{radoio} - \tau_{ab} * I_{radoio} + (1/(X_b - X_{ai})) * I_{radbio} + \text{SQUAREPULSE}(st, 1/365) * mst$$

;rbdoio

$$d/dt(L_{rbdoio}) = \beta * S_{doio} * T_{Irb}/N_0 - (\mu + \gamma) * L_{rbdoio} + (1/X_{ao}) * L_{rbdaiio} - \tau_1 * L_{rbdoio} + (1/(X_b - X_{ai})) * L_{rbdbio}$$



$$\begin{aligned} d/dt(B_{rbdoio}) &= \gamma * L_{rbdoio} - (\mu + \sigma) * B_{rbdoio} - c_{Brbdo} * B_{rbdoio} - \tau * B_{rbdoio} + (1/X_{ao}) * B_{rbdaio} - \tau_1 * B_{rbdoio} - \\ &\tau_2 * B_{rbdoio} - \tau_{ab} * B_{rbdoio} + (1/(X_b - X_{ai})) * B_{rdbbio} \\ d/dt(I_{rbdoio}) &= \sigma * B_{rbdoio} - (\mu + \delta) * I_{rbdoio} - c_{Irbdo} * I_{rbdoio} - \tau * I_{rbdoio} + (1/X_{ao}) * I_{rbdaio} - \tau_1 * I_{rbdoio} - \tau_2 * I_{rbdoio} \\ &- \tau_{ab} * I_{rbdoio} + (1/(X_b - X_{ai})) * I_{rdbbio} \end{aligned}$$

;Box N<sub>daio</sub>

init S<sub>daio</sub> = 0  
;init B<sub>daio</sub> = B<sub>daio0</sub>  
;init L<sub>daio</sub> = L<sub>daio0</sub>  
;init I<sub>daio</sub> = I<sub>daio0</sub>

$$\begin{aligned} L_{daio} &= L_{rodaio} + L_{radaio} + L_{rbdaio} \\ B_{daio} &= B_{rodaio} + B_{radaio} + B_{rbdaio} \\ I_{daio} &= I_{rodaio} + I_{radaio} + I_{rbdaio} \end{aligned}$$

init L<sub>rodaio</sub> = 0  
init L<sub>radaio</sub> = 0  
init L<sub>rbdaio</sub> = 0  
init B<sub>rodaio</sub> = 0  
init B<sub>radaio</sub> = 0  
init B<sub>rbdaio</sub> = 0  
init I<sub>rodaio</sub> = 0  
init I<sub>radaio</sub> = 0  
init I<sub>rbdaio</sub> = 0

$$\begin{aligned} d/dt(S_{daio}) &= -\mu * S_{daio} - \beta * S_{daio} * T_{Iro}/N_0 + \delta * I_{rodaio} + c_{Broda} * B_{rodaio} + c_{Iroda} * I_{rodaio} - \beta * S_{daio} * T_{Ira}/N_0 + \\ &\delta * I_{radaio} + c_{Brada} * B_{radaio} + c_{Irada} * I_{radaio} - \beta * S_{daio} * T_{Irb}/N_0 + \delta * I_{rbdaio} + c_{Brbda} * B_{rbdaio} + c_{Irbda} * I_{rbdaio} - \\ &(1/X_{ao}) * S_{daio} - \tau_1 * S_{daio} \end{aligned}$$

;rodaio

$$\begin{aligned} d/dt(L_{rodaio}) &= \beta * S_{daio} * T_{Iro}/N_0 - (\mu + \gamma) * L_{rodaio} - (1/X_{ao}) * L_{rodaio} - \tau_1 * L_{rodaio} \\ d/dt(B_{rodaio}) &= \gamma * L_{rodaio} - (\mu + \sigma) * B_{rodaio} - c_{Broda} * B_{rodaio} + \tau * B_{rodoio} - (1/X_{ao}) * B_{rodaio} - \tau_1 * B_{rodaio} - \\ &\tau_2 * B_{rodaio} \\ d/dt(I_{rodaio}) &= \sigma * B_{rodaio} - (\mu + \delta) * I_{rodaio} - c_{Iroda} * I_{rodaio} + \tau * I_{rodoio} - (1/X_{ao}) * I_{rodaio} - \tau_1 * I_{rodaio} - \tau_2 * I_{rodaio} \end{aligned}$$

;radaio

$$\begin{aligned} d/dt(L_{radaio}) &= \beta * S_{daio} * T_{Ira}/N_0 - (\mu + \gamma) * L_{radaio} - (1/X_{ao}) * L_{radaio} - \tau_1 * L_{radaio} \\ d/dt(B_{radaio}) &= \gamma * L_{radaio} - (\mu + \sigma) * B_{radaio} - c_{Brada} * B_{radaio} + \tau * B_{radoio} - (1/X_{ao}) * B_{radaio} - \tau_1 * B_{radaio} - \\ &\tau_2 * B_{radaio} \\ d/dt(I_{radaio}) &= \sigma * B_{radaio} - (\mu + \delta) * I_{radaio} - c_{Irada} * I_{radaio} + \tau * I_{radoio} - (1/X_{ao}) * I_{radaio} - \tau_1 * I_{radaio} - \tau_2 * I_{radaio} \end{aligned}$$

;rbdaio

$$\begin{aligned}
d/dt(L_{rbdaio}) &= \beta * S_{daio} * T_{Irb} / N_0 - (\mu + \gamma) * L_{rbdaio} - (1/X_{ao}) * L_{rbdaio} - \tau_1 * L_{rbdaio} \\
d/dt(B_{rbdaio}) &= \gamma * L_{rbdaio} - (\mu + \sigma) * B_{rbdaio} - c_{Brbda} * B_{rbdaio} + \tau * B_{rbdio} - (1/X_{ao}) * B_{rbdaio} - \tau_1 * B_{rbdaio} - \\
&\tau_2 * B_{rbdaio} \\
d/dt(I_{rbdaio}) &= \sigma * B_{rbdaio} - (\mu + \delta) * I_{rbdaio} - c_{Irbda} * I_{rbdaio} + \tau * I_{rbdio} - (1/X_{ao}) * I_{rbdaio} - \tau_1 * I_{rbdaio} - \tau_2 * I_{rbdaio}
\end{aligned}$$

$$\begin{aligned}
N_{doio} &= S_{doio} + L_{rodoio} + B_{rodoio} + I_{rodoio} + L_{radoio} + B_{radoio} + I_{radoio} + L_{rbdio} + B_{rbdio} + I_{rbdio} \\
N_{daio} &= S_{daio} + L_{rodaio} + B_{rodaio} + I_{rodaio} + L_{radaio} + B_{radaio} + I_{radaio} + L_{rbdaio} + B_{rbdaio} + I_{rbdaio}
\end{aligned}$$

;Intervention 1  
;MDA using artesunate/piperazine +/- primaquine  
;N<sub>dabil</sub>, N<sub>dbil</sub>, N<sub>doil</sub>

;Box N<sub>dabil</sub>

init S<sub>dabil</sub> = 0  
;init B<sub>dabil</sub> = B<sub>dabil</sub>0  
;init L<sub>dabil</sub> = L<sub>dabil</sub>0  
;init I<sub>dabil</sub> = I<sub>dabil</sub>0

L<sub>dabil</sub> = L<sub>rodabil</sub> + L<sub>radabil</sub> + L<sub>rbdabil</sub>  
B<sub>dabil</sub> = B<sub>rodabil</sub> + B<sub>radabil</sub> + B<sub>rbdabil</sub>  
I<sub>dabil</sub> = I<sub>rodabil</sub> + I<sub>radabil</sub> + I<sub>rbdabil</sub>

init L<sub>rodabil</sub> = 0  
init L<sub>radabil</sub> = 0  
init L<sub>rbdabil</sub> = 0  
init B<sub>rodabil</sub> = 0  
init B<sub>radabil</sub> = 0  
init B<sub>rbdabil</sub> = 0  
init I<sub>rodabil</sub> = 0  
init I<sub>radabil</sub> = 0  
init I<sub>rbdabil</sub> = 0

$$\begin{aligned}
d/dt(S_{dabil}) &= -\mu * S_{dabil} - \beta * S_{dabil} * T_{Iro} / N_0 + \delta * I_{rodabil} + c_{Brodab} * B_{rodabil} + c_{Irodab} * I_{rodabil} - \\
&\beta * S_{dabil} * T_{Ira} / N_0 + \delta * I_{radabil} + c_{Bradab} * B_{radabil} + c_{Iradab} * I_{radabil} - \beta * S_{dabil} * T_{Irb} / N_0 + \delta * I_{rbdabil} + \\
&c_{Brbdab} * B_{rbdabil} + c_{Irbdab} * I_{rbdabil} + \tau_1 * S_{doio} + \tau_1 * S_{daio} - (1/X_{ai}) * S_{dabil} + c_{Lp} * L_{rodabil} + c_{Ip} * I_{rodabil} + \\
&c_{Lp} * L_{radabil} + c_{Ip} * I_{radabil} + c_{Lp} * L_{rbdabil} + c_{Ip} * I_{rbdabil}
\end{aligned}$$

;rodabil

$$\begin{aligned}
d/dt(L_{rodabil}) &= \beta * S_{dabil} * T_{Iro} / N_0 - (\mu + \gamma) * L_{rodabil} + \tau_1 * L_{rodoio} + \tau_1 * L_{rodaio} - (1/X_{ai}) * L_{rodabil} - \\
& c_{Lp} * L_{rodabil} \\
d/dt(B_{rodabil}) &= \gamma * L_{rodabil} - (\mu + \sigma) * B_{rodabil} - c_{Brodab} * B_{rodabil} + \tau_1 * B_{rodoio} + \tau_1 * B_{rodaio} - (1/X_{ai}) * B_{rodabil} \\
& + \tau_{abil} * B_{rodoil} + \tau_1 * B_{rodoil} \\
d/dt(I_{rodabil}) &= \sigma * B_{rodabil} - (\mu + \delta) * I_{rodabil} - c_{Irodab} * I_{rodabil} + \tau_1 * I_{rodoio} + \tau_1 * I_{rodaio} - (1/X_{ai}) * I_{rodabil} + \\
& \tau_{abil} * I_{rodoil} - c_{Ip} * I_{rodabil} + \tau_1 * I_{rodoil}
\end{aligned}$$

;radabil

$$\begin{aligned}
d/dt(L_{radabil}) &= \beta * S_{dabil} * T_{Ira} / N_0 - (\mu + \gamma) * L_{radabil} + \tau_1 * L_{radoio} + \tau_1 * L_{radaio} - (1/X_{ai}) * L_{radabil} - \\
& c_{Lp} * L_{radabil} \\
d/dt(B_{radabil}) &= \gamma * L_{radabil} - (\mu + \sigma) * B_{radabil} - c_{Bradab} * B_{radabil} + \tau_1 * B_{radoio} + \tau_1 * B_{radaio} - (1/X_{ai}) * B_{radabil} \\
& + \tau_{abil} * B_{radoil} + \tau_1 * B_{radoil} \\
d/dt(I_{radabil}) &= \sigma * B_{radabil} - (\mu + \delta) * I_{radabil} - c_{Iradab} * I_{radabil} + \tau_1 * I_{radoio} + \tau_1 * I_{radaio} - (1/X_{ai}) * I_{radabil} + \\
& \tau_{abil} * I_{radoil} - c_{Ip} * I_{radabil} + \tau_1 * I_{radoil}
\end{aligned}$$

;rbdabil

$$\begin{aligned}
d/dt(L_{rbdabil}) &= \beta * S_{dabil} * T_{Irb} / N_0 - (\mu + \gamma) * L_{rbdabil} + \tau_1 * L_{rbdoio} + \tau_1 * L_{rbdai} - (1/X_{ai}) * L_{rbdabil} - \\
& c_{Lp} * L_{rbdabil} \\
d/dt(B_{rbdabil}) &= \gamma * L_{rbdabil} - (\mu + \sigma) * B_{rbdabil} - c_{Brbdab} * B_{rbdabil} + \tau_1 * B_{rbdoio} + \tau_1 * B_{rbdai} - (1/X_{ai}) * B_{rbdabil} \\
& + \tau_{abil} * B_{rbdoil} + \tau_{abil} * B_{rdbbil} + \tau_1 * B_{rbdoil} \\
d/dt(I_{rbdabil}) &= \sigma * B_{rbdabil} - (\mu + \delta) * I_{rbdabil} - c_{Irbdb} * I_{rbdabil} + \tau_1 * I_{rbdoio} + \tau_1 * I_{rbdai} - (1/X_{ai}) * I_{rbdabil} + \\
& \tau_{abil} * I_{rbdoil} + \tau_{abil} * I_{rdbbil} - c_{Ip} * I_{rbdabil} + \tau_1 * I_{rbdoil}
\end{aligned}$$

$$N_{dabil} = S_{dabil} + L_{rodabil} + B_{rodabil} + I_{rodabil} + L_{radabil} + B_{radabil} + I_{radabil} + L_{rbdabil} + B_{rbdabil} + I_{rbdabil}$$

;Box N<sub>dbil</sub>

$$\begin{aligned}
& \text{init } S_{dbil} = 0 \\
& \text{;init } B_{dbil} = B_{dbil} 0 \\
& \text{;init } L_{dbil} = L_{dbil} 0 \\
& \text{;init } I_{dbil} = I_{dbil} 0
\end{aligned}$$

$$\begin{aligned}
L_{dbil} &= L_{rodabil} + L_{radabil} + L_{rbdabil} \\
B_{dbil} &= B_{rodabil} + B_{radabil} + B_{rbdabil} \\
I_{dbil} &= I_{rodabil} + I_{radabil} + I_{rbdabil}
\end{aligned}$$

$$\begin{aligned}
& \text{init } L_{rodabil} = 0 \\
& \text{init } L_{radabil} = 0 \\
& \text{init } L_{rbdabil} = 0 \\
& \text{init } B_{rodabil} = 0 \\
& \text{init } B_{radabil} = 0
\end{aligned}$$

init  $B_{rdbil} = 0$   
 init  $I_{rodbil} = 0$   
 init  $I_{radbil} = 0$   
 init  $I_{rdbil} = 0$

$$\begin{aligned}
 d/dt(S_{dbil}) = & -\mu * S_{dbil} - \beta * S_{dbil} * T_{Iro}/N_0 + \delta * I_{rodbil} + c_{Brodb} * B_{rodbil} + c_{Irodb} * I_{rodbil} - \beta * S_{dbil} * T_{Ira}/N_0 \\
 & + \delta * I_{radbil} + c_{Bradb} * B_{radbil} + c_{Iradb} * I_{radbil} - \beta * S_{dbil} * T_{Irb}/N_0 + \delta * I_{rdbil} + c_{Brbdb} * B_{rdbil} + c_{Irbdb} * I_{rdbil} + \\
 & (1/X_{ai}) * S_{dabil} - (1/(X_b - X_{ai})) * S_{dbil}
 \end{aligned}$$

;rodbil

$$\begin{aligned}
 d/dt(L_{rodbil}) = & \beta * S_{dbil} * T_{Iro}/N_0 - (\mu + \gamma) * L_{rodbil} + (1/X_{ai}) * L_{rodabil} - (1/(X_b - X_{ai})) * L_{rodbil} \\
 d/dt(B_{rodbil}) = & \gamma * L_{rodbil} - (\mu + \sigma) * B_{rodbil} - c_{Brodb} * B_{rodbil} + (1/X_{ai}) * B_{rodabil} - (1/(X_b - X_{ai})) * B_{rodbil} \\
 d/dt(I_{rodbil}) = & \sigma * B_{rodbil} - (\mu + \delta) * I_{rodbil} - c_{Irodb} * I_{rodbil} + (1/X_{ai}) * I_{rodabil} - (1/(X_b - X_{ai})) * I_{rodbil}
 \end{aligned}$$

;radbil

$$\begin{aligned}
 d/dt(L_{radbil}) = & \beta * S_{dbil} * T_{Ira}/N_0 - (\mu + \gamma) * L_{radbil} + (1/X_{ai}) * L_{radabil} - (1/(X_b - X_{ai})) * L_{radbil} \\
 d/dt(B_{radbil}) = & \gamma * L_{radbil} - (\mu + \sigma) * B_{radbil} - c_{Bradb} * B_{radbil} + (1/X_{ai}) * B_{radabil} - (1/(X_b - X_{ai})) * B_{radbil} \\
 d/dt(I_{radbil}) = & \sigma * B_{radbil} - (\mu + \delta) * I_{radbil} - c_{Iradb} * I_{radbil} + (1/X_{ai}) * I_{radabil} - (1/(X_b - X_{ai})) * I_{radbil}
 \end{aligned}$$

;rdbbil

$$\begin{aligned}
 d/dt(L_{rdbbil}) = & \beta * S_{dbil} * T_{Irb}/N_0 - (\mu + \gamma) * L_{rdbbil} + (1/X_{ai}) * L_{rdbdabil} - (1/(X_b - X_{ai})) * L_{rdbbil} \\
 d/dt(B_{rdbbil}) = & \gamma * L_{rdbbil} - (\mu + \sigma) * B_{rdbbil} - c_{Brbdb} * B_{rdbbil} + (1/X_{ai}) * B_{rdbdabil} - (1/(X_b - X_{ai})) * B_{rdbbil} - \\
 & \tau_{abil} * B_{rdbbil} - \tau_{ai1} * B_{rdbbil} \\
 d/dt(I_{rdbbil}) = & \sigma * B_{rdbbil} - (\mu + \delta) * I_{rdbbil} - c_{Irbdb} * I_{rdbbil} + (1/X_{ai}) * I_{rdbdabil} - (1/(X_b - X_{ai})) * I_{rdbbil} - \\
 & \tau_{abil} * I_{rdbbil} - \tau_{ai1} * I_{rdbbil}
 \end{aligned}$$

$$N_{dbil} = S_{dbil} + L_{rodbil} + B_{rodbil} + I_{rodbil} + L_{radbil} + B_{radbil} + I_{radbil} + L_{rdbbil} + B_{rdbbil} + I_{rdbil}$$

;Box  $N_{doil}$

init  $S_{doil} = 0; N_0 - I_{doil} 0$   
 ;init  $B_{doil} = B_{doil} 0$   
 ;init  $L_{doil} = L_{doil} 0$   
 $I_{doil} 0 = 0; N_0 * p_{inf}$

$$\begin{aligned}
 L_{doil} = & L_{rodoil} + L_{radoil} + L_{rbdail} \\
 B_{doil} = & B_{rodoil} + B_{radoil} + B_{rbdail} \\
 I_{doil} = & I_{rodoil} + I_{radoil} + I_{rbdail}
 \end{aligned}$$

init  $L_{rodoil} = 0$

init  $L_{\text{radoil}} = 0$   
 init  $L_{\text{rbdoil}} = 0$   
 init  $B_{\text{radoil}} = 0$   
 init  $B_{\text{rbdoil}} = 0$   
 init  $I_{\text{radoil}} = 0; p_o * I_{\text{doil}} 0$   
 init  $I_{\text{radoil}} = 0; p_a * I_{\text{doil}} 0$   
 init  $I_{\text{rbdoil}} = 0; p_b * I_{\text{doil}} 0$

$$\begin{aligned}
 d/dt(S_{\text{doil}}) = & -\mu * S_{\text{doil}} - \beta * S_{\text{doil}} * T_{\text{Iro}}/N_0 + \delta * I_{\text{radoil}} + c_{\text{Brodo}} * B_{\text{radoil}} + c_{\text{Irodo}} * I_{\text{radoil}} - \beta * S_{\text{doil}} * T_{\text{Ira}}/N_0 + \\
 & \delta * I_{\text{radoil}} + c_{\text{Brado}} * B_{\text{radoil}} + c_{\text{Irado}} * I_{\text{radoil}} - \beta * S_{\text{doil}} * T_{\text{Irb}}/N_0 + \delta * I_{\text{rbdoil}} + c_{\text{Brbdo}} * B_{\text{rbdoil}} + c_{\text{Irbdo}} * I_{\text{rbdoil}} + \\
 & (1/(X_b - X_{\text{ai}})) * S_{\text{dbil}} + 1/(X_b - X_{\text{ai}} - X_{\text{ao}}) * S_{\text{dbila}} + (1/X_{\text{ao}}) * S_{\text{daila}}
 \end{aligned}$$

;radoil

$$\begin{aligned}
 d/dt(L_{\text{radoil}}) = & \beta * S_{\text{doil}} * T_{\text{Iro}}/N_0 - (\mu + \gamma) * L_{\text{radoil}} + (1/(X_b - X_{\text{ai}})) * L_{\text{radbil}} + 1/(X_b - X_{\text{ai}} - X_{\text{ao}}) * L_{\text{radbila}} + \\
 & (1/X_{\text{ao}}) * L_{\text{radaila}} \\
 d/dt(B_{\text{radoil}}) = & \gamma * L_{\text{radoil}} - (\mu + \sigma) * B_{\text{radoil}} - c_{\text{Brodo}} * B_{\text{radoil}} + (1/(X_b - X_{\text{ai}})) * B_{\text{radbil}} - \tau_{\text{abil}} * B_{\text{radoil}} + 1/(X_b - \\
 & X_{\text{ai}} - X_{\text{ao}}) * B_{\text{radbila}} - \tau_{\text{ail}} * B_{\text{radoil}} + (1/X_{\text{ao}}) * B_{\text{radaila}} - \tau_1 * B_{\text{radoil}} \\
 d/dt(I_{\text{radoil}}) = & \sigma * B_{\text{radoil}} - (\mu + \delta) * I_{\text{radoil}} - c_{\text{Irodo}} * I_{\text{radoil}} + (1/(X_b - X_{\text{ai}})) * I_{\text{radbil}} - \tau_{\text{abil}} * I_{\text{radoil}} + 1/(X_b - X_{\text{ai}} - \\
 & X_{\text{ao}}) * I_{\text{radbila}} - \tau_{\text{ail}} * I_{\text{radoil}} + (1/X_{\text{ao}}) * I_{\text{radaila}} - \tau_1 * I_{\text{radoil}}
 \end{aligned}$$

;radoil

$$\begin{aligned}
 d/dt(L_{\text{radoil}}) = & \beta * S_{\text{doil}} * T_{\text{Ira}}/N_0 - (\mu + \gamma) * L_{\text{radoil}} + (1/(X_b - X_{\text{ai}})) * L_{\text{radbil}} + 1/(X_b - X_{\text{ai}} - X_{\text{ao}}) * L_{\text{radbila}} + \\
 & (1/X_{\text{ao}}) * L_{\text{radaila}} \\
 d/dt(B_{\text{radoil}}) = & \gamma * L_{\text{radoil}} - (\mu + \sigma) * B_{\text{radoil}} - c_{\text{Brado}} * B_{\text{radoil}} + (1/(X_b - X_{\text{ai}})) * B_{\text{radbil}} - \tau_{\text{abil}} * B_{\text{radoil}} + 1/(X_b - \\
 & X_{\text{ai}} - X_{\text{ao}}) * B_{\text{radbila}} - \tau_{\text{ail}} * B_{\text{radoil}} + (1/X_{\text{ao}}) * B_{\text{radaila}} - \tau_1 * B_{\text{radoil}} \\
 d/dt(I_{\text{radoil}}) = & \sigma * B_{\text{radoil}} - (\mu + \delta) * I_{\text{radoil}} - c_{\text{Irado}} * I_{\text{radoil}} + (1/(X_b - X_{\text{ai}})) * I_{\text{radbil}} - \tau_{\text{abil}} * I_{\text{radoil}} + 1/(X_b - X_{\text{ai}} - \\
 & X_{\text{ao}}) * I_{\text{radbila}} - \tau_{\text{ail}} * I_{\text{radoil}} + (1/X_{\text{ao}}) * I_{\text{radaila}} - \tau_1 * I_{\text{radoil}}
 \end{aligned}$$

;rbdoil

$$\begin{aligned}
 d/dt(L_{\text{rbdoil}}) = & \beta * S_{\text{doil}} * T_{\text{Irb}}/N_0 - (\mu + \gamma) * L_{\text{rbdoil}} + (1/(X_b - X_{\text{ai}})) * L_{\text{rbdbil}} + 1/(X_b - X_{\text{ai}} - X_{\text{ao}}) * L_{\text{rbdbila}} + \\
 & (1/X_{\text{ao}}) * L_{\text{rbdaila}} \\
 d/dt(B_{\text{rbdoil}}) = & \gamma * L_{\text{rbdoil}} - (\mu + \sigma) * B_{\text{rbdoil}} - c_{\text{Brbdo}} * B_{\text{rbdoil}} + (1/(X_b - X_{\text{ai}})) * B_{\text{rbdbil}} - \tau_{\text{abil}} * B_{\text{rbdoil}} + 1/(X_b - \\
 & X_{\text{ai}} - X_{\text{ao}}) * B_{\text{rbdbila}} - \tau_{\text{ail}} * B_{\text{rbdoil}} + (1/X_{\text{ao}}) * B_{\text{rbdaila}} - \tau_1 * B_{\text{rbdoil}} \\
 d/dt(I_{\text{rbdoil}}) = & \sigma * B_{\text{rbdoil}} - (\mu + \delta) * I_{\text{rbdoil}} - c_{\text{Irbdo}} * I_{\text{rbdoil}} + (1/(X_b - X_{\text{ai}})) * I_{\text{rbdbil}} - \tau_{\text{abil}} * I_{\text{rbdoil}} + 1/(X_b - X_{\text{ai}} - \\
 & X_{\text{ao}}) * I_{\text{rbdbila}} - \tau_{\text{ail}} * I_{\text{rbdoil}} + (1/X_{\text{ao}}) * I_{\text{rbdaila}} - \tau_1 * I_{\text{rbdoil}}
 \end{aligned}$$

$$N_{\text{doil}} = S_{\text{doil}} + L_{\text{radoil}} + B_{\text{radoil}} + I_{\text{radoil}} + L_{\text{radoil}} + B_{\text{radoil}} + I_{\text{radoil}} + L_{\text{rbdoil}} + B_{\text{rbdoil}} + I_{\text{rbdoil}}$$

;Treatment with artesunate in Intervention 1

; N<sub>daila</sub>

;Box N<sub>daila</sub>

init S<sub>daila</sub> = 0

;init B<sub>daila</sub> = B<sub>daila</sub>0

;init L<sub>daila</sub> = L<sub>daila</sub>0

;init I<sub>daila</sub> = I<sub>daila</sub>0

L<sub>daila</sub> = L<sub>rodaila</sub>+L<sub>radaila</sub>+L<sub>rbdaila</sub>

B<sub>daila</sub> = B<sub>rodaila</sub>+B<sub>radaila</sub>+B<sub>rbdaila</sub>

I<sub>daila</sub> = I<sub>rodaila</sub>+I<sub>radaila</sub>+I<sub>rbdaila</sub>

init L<sub>rodaila</sub> = 0

init L<sub>radaila</sub> = 0

init L<sub>rbdaila</sub> = 0

init B<sub>rodaila</sub> = 0

init B<sub>radaila</sub> = 0

init B<sub>rbdaila</sub> = 0

init I<sub>rodaila</sub> = 0

init I<sub>radaila</sub> = 0

init I<sub>rbdaila</sub> = 0

$$\begin{aligned} d/dt(S_{daila}) = & -\mu*S_{daila} - \beta*S_{daila}*T_{Iro}/N_0 + \delta*I_{rodaila} + c_{Broda}*B_{rodaila} + c_{Iroda}*I_{rodaila} - \\ & \beta*S_{daila}*T_{Ira}/N_0 + \delta*I_{radaila} + c_{Brada}*B_{radaila} + c_{Irada}*I_{radaila} - \beta*S_{daila}*T_{Irb}/N_0 + \delta*I_{rbdaila} + \\ & c_{Brbda}*B_{rbdaila} + c_{Irbda}*I_{rbdaila} - (1/X_{ao})*S_{daila} \end{aligned}$$

;rodaila

$$d/dt(L_{rodaila}) = \beta*S_{daila}*T_{Iro}/N_0 - (\mu+\gamma)*L_{rodaila} - (1/X_{ao})*L_{rodaila}$$

$$d/dt(B_{rodaila}) = \gamma*L_{rodaila} - (\mu+\sigma)*B_{rodaila} - c_{Broda}*B_{rodaila} + \tau_{ail}*B_{rodoi1} - (1/X_{ao})*B_{rodaila}$$

$$d/dt(I_{rodaila}) = \sigma*B_{rodaila} - (\mu+\delta)*I_{rodaila} - c_{Iroda}*I_{rodaila} + \tau_{ail}*I_{rodoi1} - (1/X_{ao})*I_{rodaila}$$

;radaila

$$d/dt(L_{radaila}) = \beta*S_{daila}*T_{Ira}/N_0 - (\mu+\gamma)*L_{radaila} - (1/X_{ao})*L_{radaila}$$

$$d/dt(B_{radaila}) = \gamma*L_{radaila} - (\mu+\sigma)*B_{radaila} - c_{Brada}*B_{radaila} + \tau_{ail}*B_{radoi1} - (1/X_{ao})*B_{radaila}$$

$$d/dt(I_{radaila}) = \sigma*B_{radaila} - (\mu+\delta)*I_{radaila} - c_{Irada}*I_{radaila} + \tau_{ail}*I_{radoi1} - (1/X_{ao})*I_{radaila}$$

;rbdaila

$$d/dt(L_{rbdaila}) = \beta*S_{daila}*T_{Irb}/N_0 - (\mu+\gamma)*L_{rbdaila} - (1/X_{ao})*L_{rbdaila}$$

$$d/dt(B_{rbdaila}) = \gamma*L_{rbdaila} - (\mu+\sigma)*B_{rbdaila} - c_{Brbda}*B_{rbdaila} + \tau_{ail}*B_{rbdoi1} - (1/X_{ao})*B_{rbdaila}$$

$$d/dt(I_{rbdaila}) = \sigma*B_{rbdaila} - (\mu+\delta)*I_{rbdaila} - c_{Irbda}*I_{rbdaila} + \tau_{ail}*I_{rbdoi1} - (1/X_{ao})*I_{rbdaila}$$

$$N_{daila} = S_{daila} + L_{rodaila} + B_{rodaila} + I_{rodaila} + L_{radaila} + B_{radaila} + I_{radaila} + L_{rbdaila} + B_{rbdaila} + I_{rbdaila}$$

;Treatment of infected patients with artesunate/piperaquine in Intervention 1

; N<sub>dabila</sub>, N<sub>dbila</sub>

;Box N<sub>dabila</sub>

init S<sub>dabila</sub> = 0

;init B<sub>dabila</sub> = B<sub>dabila</sub>0

;init L<sub>dabila</sub> = L<sub>dabila</sub>0

;init I<sub>dabila</sub> = I<sub>dabila</sub>0

L<sub>dabila</sub> = L<sub>rodabila</sub>+L<sub>radabila</sub>+L<sub>rbdabila</sub>

B<sub>dabila</sub> = B<sub>rodabila</sub>+B<sub>radabila</sub>+B<sub>rbdabila</sub>

I<sub>dabila</sub> = I<sub>rodabila</sub>+I<sub>radabila</sub>+I<sub>rbdabila</sub>

init L<sub>rodabila</sub> = 0

init L<sub>radabila</sub> = 0

init L<sub>rbdabila</sub> = 0

init B<sub>rodabila</sub> = 0

init B<sub>radabila</sub> = 0

init B<sub>rbdabila</sub> = 0

init I<sub>rodabila</sub> = 0

init I<sub>radabila</sub> = 0

init I<sub>rbdabila</sub> = 0

d/dt(S<sub>dabila</sub>) = - μ\*S<sub>dabila</sub> - β\*S<sub>dabila</sub>\*T<sub>Iro</sub>/N<sub>0</sub> + δ\*I<sub>rodabila</sub> + c<sub>Brodab</sub>\*B<sub>rodabila</sub> + c<sub>Irodab</sub>\*I<sub>rodabila</sub> -  
β\*S<sub>dabila</sub>\*T<sub>Ira</sub>/N<sub>0</sub> + δ\*I<sub>radabila</sub> + c<sub>Bradab</sub>\*B<sub>radabila</sub> + c<sub>Iradab</sub>\*I<sub>radabila</sub> - β\*S<sub>dabila</sub>\*T<sub>Irb</sub>/N<sub>0</sub> + δ\*I<sub>rbdabila</sub> +  
c<sub>Brbdab</sub>\*B<sub>rbdabila</sub> + c<sub>Irbdb</sub>\*I<sub>rbdabila</sub> - (1/X<sub>ao</sub>\*S<sub>dabila</sub>)

;rodabila

d/dt(L<sub>rodabila</sub>) = β\*S<sub>dabila</sub>\*T<sub>Iro</sub>/N<sub>0</sub> - (μ+γ)\*L<sub>rodabila</sub> - (1/X<sub>ao</sub>)\*L<sub>rodabila</sub>

d/dt(B<sub>rodabila</sub>) = γ\*L<sub>rodabila</sub> - (μ+σ)\*B<sub>rodabila</sub> - c<sub>Brodab</sub>\*B<sub>rodabila</sub> - (1/X<sub>ao</sub>)\*B<sub>rodabila</sub>

d/dt(I<sub>rodabila</sub>) = σ\*B<sub>rodabila</sub> - (μ+δ)\*I<sub>rodabila</sub> - c<sub>Irodab</sub>\*I<sub>rodabila</sub> - (1/X<sub>ao</sub>)\*I<sub>rodabila</sub>

;radabila

d/dt(L<sub>radabila</sub>) = β\*S<sub>dabila</sub>\*T<sub>Ira</sub>/N<sub>0</sub> - (μ+γ)\*L<sub>radabila</sub> - (1/X<sub>ao</sub>)\*L<sub>radabila</sub>

d/dt(B<sub>radabila</sub>) = γ\*L<sub>radabila</sub> - (μ+σ)\*B<sub>radabila</sub> - c<sub>Bradab</sub>\*B<sub>radabila</sub> - (1/X<sub>ao</sub>)\*B<sub>radabila</sub>

d/dt(I<sub>radabila</sub>) = σ\*B<sub>radabila</sub> - (μ+δ)\*I<sub>radabila</sub> - c<sub>Iradab</sub>\*I<sub>radabila</sub> - (1/X<sub>ao</sub>)\*I<sub>radabila</sub>

;rbdabila

d/dt(L<sub>rbdabila</sub>) = β\*S<sub>dabila</sub>\*T<sub>Irb</sub>/N<sub>0</sub> - (μ+γ)\*L<sub>rbdabila</sub> - (1/X<sub>ao</sub>)\*L<sub>rbdabila</sub>

$$d/dt(B_{rdbdabila}) = \gamma * L_{rdbdabila} - (\mu + \sigma) * B_{rdbdabila} - c_{Brdbdab} * B_{rdbdabila} + \tau_{ail} * B_{rdbdabila} - (1/X_{ao}) * B_{rdbdabila} + \tau_{ail} * B_{rdbdabil}$$

$$d/dt(I_{rdbdabila}) = \sigma * B_{rdbdabila} - (\mu + \delta) * I_{rdbdabila} - c_{Irbdbdab} * I_{rdbdabila} + \tau_{ail} * I_{rdbdabila} - (1/X_{ao}) * I_{rdbdabila} + \tau_{ail} * I_{rdbdabil}$$

$$N_{dbabila} = S_{dbabila} + L_{rodabila} + B_{rodabila} + I_{rodabila} + L_{radabila} + B_{radabila} + I_{radabila} + L_{rdbdabila} + B_{rdbdabila} + I_{rdbdabila}$$

;Box N<sub>dbila</sub>

$$\text{init } S_{dbila} = 0$$

$$\text{;init } B_{dbila} = B_{dbila}0$$

$$\text{;init } L_{dbila} = L_{dbila}0$$

$$\text{;init } I_{dbila} = I_{dbila}0$$

$$L_{dbila} = L_{rodabila} + L_{radabila} + L_{rdbdabila}$$

$$B_{dbila} = B_{rodabila} + B_{radabila} + B_{rdbdabila}$$

$$I_{dbila} = I_{rodabila} + I_{radabila} + I_{rdbdabila}$$

$$\text{init } L_{rodabila} = 0$$

$$\text{init } L_{radabila} = 0$$

$$\text{init } L_{rdbdabila} = 0$$

$$\text{init } B_{rodabila} = 0$$

$$\text{init } B_{radabila} = 0$$

$$\text{init } B_{rdbdabila} = 0$$

$$\text{init } I_{rodabila} = 0$$

$$\text{init } I_{radabila} = 0$$

$$\text{init } I_{rdbdabila} = 0$$

$$d/dt(S_{dbila}) = -\mu * S_{dbila} - \beta * S_{dbila} * T_{Iro}/N_0 + \delta * I_{rodabila} + c_{Brodb} * B_{rodabila} + c_{Irodab} * I_{rodabila} - \beta * S_{dbila} * T_{Ira}/N_0 + \delta * I_{radabila} + c_{Bradb} * B_{radabila} + c_{Iradab} * I_{radabila} - \beta * S_{dbila} * T_{Irb}/N_0 + \delta * I_{rdbdabila} + c_{Brbdb} * B_{rdbdabila} + c_{Irbdbd} * I_{rdbdabila} + (1/X_{ao} * S_{dbila}) - 1/(X_b - X_{ai} - X_{ao}) * S_{dbila}$$

;rodabila

$$d/dt(L_{rodabila}) = \beta * S_{dbila} * T_{Iro}/N_0 - (\mu + \gamma) * L_{rodabila} + (1/X_{ao}) * L_{rodabila} - 1/(X_b - X_{ai} - X_{ao}) * L_{rodabila}$$

$$d/dt(B_{rodabila}) = \gamma * L_{rodabila} - (\mu + \sigma) * B_{rodabila} - c_{Brodb} * B_{rodabila} + (1/X_{ao}) * B_{rodabila} - 1/(X_b - X_{ai} - X_{ao}) * B_{rodabila}$$

$$d/dt(I_{rodabila}) = \sigma * B_{rodabila} - (\mu + \delta) * I_{rodabila} - c_{Irodab} * I_{rodabila} + (1/X_{ao}) * I_{rodabila} - 1/(X_b - X_{ai} - X_{ao}) * I_{rodabila}$$

;radabila

$$d/dt(L_{radabila}) = \beta * S_{dbila} * T_{Ira}/N_0 - (\mu + \gamma) * L_{radabila} + (1/X_{ao}) * L_{radabila} - 1/(X_b - X_{ai} - X_{ao}) * L_{radabila}$$

$$d/dt(B_{radabila}) = \gamma * L_{radabila} - (\mu + \sigma) * B_{radabila} - c_{Bradb} * B_{radabila} + (1/X_{ao}) * B_{radabila} - 1/(X_b - X_{ai} - X_{ao}) * B_{radabila}$$



$$d/dt(I_{\text{radbila}}) = \sigma * B_{\text{radbila}} - (\mu + \delta) * I_{\text{radbila}} - c_{\text{Ira}} * db * I_{\text{radbila}} + (1/X_{\text{ao}}) * I_{\text{radabila}} - 1/(X_b - X_{\text{ai}} - X_{\text{ao}}) * I_{\text{radbila}}$$

;rdbbila

$$d/dt(L_{\text{rdbbila}}) = \beta * S_{\text{dbila}} * T_{\text{Irb}}/N_0 - (\mu + \gamma) * L_{\text{rdbbila}} + (1/X_{\text{ao}}) * L_{\text{rdbabila}} - 1/(X_b - X_{\text{ai}} - X_{\text{ao}}) * L_{\text{rdbbila}}$$

$$d/dt(B_{\text{rdbbila}}) = \gamma * L_{\text{rdbbila}} - (\mu + \sigma) * B_{\text{rdbbila}} - c_{\text{Brbdb}} * B_{\text{rdbbila}} - \tau_{\text{ail}} * B_{\text{rdbbila}} + (1/X_{\text{ao}}) * B_{\text{rdbabila}} - 1/(X_b - X_{\text{ai}} - X_{\text{ao}}) * B_{\text{rdbbila}}$$

$$d/dt(I_{\text{rdbbila}}) = \sigma * B_{\text{rdbbila}} - (\mu + \delta) * I_{\text{rdbbila}} - c_{\text{Irbdb}} * I_{\text{rdbbila}} - \tau_{\text{ail}} * I_{\text{rdbbila}} + (1/X_{\text{ao}}) * I_{\text{rdbabila}} - 1/(X_b - X_{\text{ai}} - X_{\text{ao}}) * I_{\text{rdbbila}}$$

$$N_{\text{dbila}} = S_{\text{dbila}} + L_{\text{rodabila}} + B_{\text{rodabila}} + I_{\text{rodabila}} + L_{\text{radabila}} + B_{\text{radabila}} + I_{\text{radabila}} + L_{\text{rdbabila}} + B_{\text{rdbabila}} + I_{\text{rdbabila}}$$

;Switch to ACT (artesunate + piperazine) for treatment in place of artesunate monotherapy

;also Intervention 3: MSAT with ACT

; N<sub>dabio</sub>, N<sub>dbio</sub>

;Box N<sub>dabio</sub>

$$\text{init } S_{\text{dabio}} = 0$$

$$\text{;init } B_{\text{dabio}} = B_{\text{dabio}}0$$

$$\text{;init } L_{\text{dabio}} = L_{\text{dabio}}0$$

$$\text{;init } I_{\text{dabio}} = I_{\text{dabio}}0$$

$$L_{\text{dabio}} = L_{\text{rodabio}} + L_{\text{radabio}} + L_{\text{rdbabio}}$$

$$B_{\text{dabio}} = B_{\text{rodabio}} + B_{\text{radabio}} + B_{\text{rdbabio}}$$

$$I_{\text{dabio}} = I_{\text{rodabio}} + I_{\text{radabio}} + I_{\text{rdbabio}}$$

$$\text{init } L_{\text{rodabio}} = 0$$

$$\text{init } L_{\text{radabio}} = 0$$

$$\text{init } L_{\text{rdbabio}} = 0$$

$$\text{init } B_{\text{rodabio}} = 0$$

$$\text{init } B_{\text{radabio}} = 0$$

$$\text{init } B_{\text{rdbabio}} = 0$$

$$\text{init } I_{\text{rodabio}} = 0$$

$$\text{init } I_{\text{radabio}} = 0$$

$$\text{init } I_{\text{rdbabio}} = 0$$

$$d/dt(S_{\text{dabio}}) = -\mu * S_{\text{dabio}} - \beta * S_{\text{dabio}} * T_{\text{Iro}}/N_0 + \delta * I_{\text{rodabio}} + c_{\text{Brodab}} * B_{\text{rodabio}} + c_{\text{Irodab}} * I_{\text{rodabio}} - \beta * S_{\text{dabio}} * T_{\text{Ira}}/N_0 + \delta * I_{\text{radabio}} + c_{\text{Bradab}} * B_{\text{radabio}} + c_{\text{Iradab}} * I_{\text{radabio}} - \beta * S_{\text{dabio}} * T_{\text{Irb}}/N_0 + \delta * I_{\text{rdbabio}} + c_{\text{Brbdb}} * B_{\text{rdbabio}} + c_{\text{Irbdb}} * I_{\text{rdbabio}} - (1/X_{\text{ai}}) * S_{\text{dabio}} + c_{\text{Lp}} * (L_{\text{rodabio}} + L_{\text{radabio}} + L_{\text{rdbabio}}) + c_{\text{Ip}} * (I_{\text{rodabio}} + I_{\text{radabio}} + I_{\text{rdbabio}})$$

;rodabio

$$d/dt(L_{rodabio}) = \beta * S_{dabio} * T_{Iro} / N_0 - (\mu + \gamma) * L_{rodabio} - (1/X_{ai}) * L_{rodabio} - c_{Lp} * L_{rodabio}$$

$$d/dt(B_{rodabio}) = \gamma * L_{rodabio} - (\mu + \sigma) * B_{rodabio} - c_{Brodab} * B_{rodabio} + \tau_{ab} * B_{rodoio} - (1/X_{ai}) * B_{rodabio}$$

$$d/dt(I_{rodabio}) = \sigma * B_{rodabio} - (\mu + \delta) * I_{rodabio} - c_{Irodab} * I_{rodabio} + \tau_{ab} * I_{rodoio} - (1/X_{ai}) * I_{rodabio} - c_{Ip} * I_{rodabio}$$

;radabio

$$d/dt(L_{radabio}) = \beta * S_{dabio} * T_{Ira} / N_0 - (\mu + \gamma) * L_{radabio} - (1/X_{ai}) * L_{radabio} - c_{Lp} * L_{radabio}$$

$$d/dt(B_{radabio}) = \gamma * L_{radabio} - (\mu + \sigma) * B_{radabio} - c_{Bradab} * B_{radabio} + \tau_{ab} * B_{radoio} - (1/X_{ai}) * B_{radabio}$$

$$d/dt(I_{radabio}) = \sigma * B_{radabio} - (\mu + \delta) * I_{radabio} - c_{Iradab} * I_{radabio} + \tau_{ab} * I_{radoio} - (1/X_{ai}) * I_{radabio} - c_{Ip} * I_{radabio}$$

;rbdabio

$$d/dt(L_{rbdabio}) = \beta * S_{dabio} * T_{Irb} / N_0 - (\mu + \gamma) * L_{rbdabio} - (1/X_{ai}) * L_{rbdabio} - c_{Lp} * L_{rbdabio}$$

$$d/dt(B_{rbdabio}) = \gamma * L_{rbdabio} - (\mu + \sigma) * B_{rbdabio} - c_{Brbdab} * B_{rbdabio} + \tau_{ab} * B_{rboio} - (1/X_{ai}) * B_{rbdabio} + \tau_{ab} * B_{rdbbio}$$

$$d/dt(I_{rbdabio}) = \sigma * B_{rbdabio} - (\mu + \delta) * I_{rbdabio} - c_{Irbdb} * I_{rbdabio} + \tau_{ab} * I_{rboio} - (1/X_{ai}) * I_{rbdabio} + \tau_{ab} * I_{rdbbio} - c_{Ip} * I_{rbdabio}$$

$$N_{dabio} = S_{dabio} + L_{rodabio} + B_{rodabio} + I_{rodabio} + L_{radabio} + B_{radabio} + I_{radabio} + L_{rbdabio} + B_{rbdabio} + I_{rbdabio}$$

;Box N<sub>dbio</sub>

$$\text{init } S_{dbio} = 0$$

$$\text{;init } B_{dbio} = B_{dbio}0$$

$$\text{;init } L_{dbio} = L_{dbio}0$$

$$\text{;init } I_{dbio} = I_{dbio}0$$

$$L_{dbio} = L_{rodbio} + L_{radbio} + L_{rdbbio}$$

$$B_{dbio} = B_{rodbio} + B_{radbio} + B_{rdbbio}$$

$$I_{dbio} = I_{rodbio} + I_{radbio} + I_{rdbbio}$$

$$\text{init } L_{rodbio} = 0$$

$$\text{init } L_{radbio} = 0$$

$$\text{init } L_{rdbbio} = 0$$

$$\text{init } B_{rodbio} = 0$$

$$\text{init } B_{radbio} = 0$$

$$\text{init } B_{rdbbio} = 0$$

$$\text{init } I_{rodbio} = 0$$

$$\text{init } I_{radbio} = 0$$

$$\text{init } I_{rdbbio} = 0$$

$$d/dt(S_{dbio}) = -\mu * S_{dbio} - \beta * S_{dbio} * T_{Iro}/N_0 + \delta * I_{rodbio} + c_{Brodb} * B_{rodbio} + c_{Irodb} * I_{rodbio} - \beta * S_{dbio} * T_{Ira}/N_0 + \delta * I_{radbio} + c_{Bradb} * B_{radbio} + c_{Iradb} * I_{radbio} - \beta * S_{dbio} * T_{Irb}/N_0 + \delta * I_{rdbio} + c_{Brbdb} * B_{rdbio} + c_{Irbdb} * I_{rdbio} + (1/X_{ai}) * S_{dabio} - (1/(X_b - X_{ai})) * S_{dbio}$$

;rodbio

$$d/dt(L_{rodbio}) = \beta * S_{dbio} * T_{Iro}/N_0 - (\mu + \gamma) * L_{rodbio} + (1/X_{ai}) * L_{rodabio} - (1/(X_b - X_{ai})) * L_{rodbio}$$

$$d/dt(B_{rodbio}) = \gamma * L_{rodbio} - (\mu + \sigma) * B_{rodbio} - c_{Brodb} * B_{rodbio} + (1/X_{ai}) * B_{rodabio} - (1/(X_b - X_{ai})) * B_{rodbio}$$

$$d/dt(I_{rodbio}) = \sigma * B_{rodbio} - (\mu + \delta) * I_{rodbio} - c_{Irodb} * I_{rodbio} + (1/X_{ai}) * I_{rodabio} - (1/(X_b - X_{ai})) * I_{rodbio}$$

;radbio

$$d/dt(L_{radbio}) = \beta * S_{dbio} * T_{Ira}/N_0 - (\mu + \gamma) * L_{radbio} + (1/X_{ai}) * L_{radabio} - (1/(X_b - X_{ai})) * L_{radbio}$$

$$d/dt(B_{radbio}) = \gamma * L_{radbio} - (\mu + \sigma) * B_{radbio} - c_{Bradb} * B_{radbio} + (1/X_{ai}) * B_{radabio} - (1/(X_b - X_{ai})) * B_{radbio}$$

$$d/dt(I_{radbio}) = \sigma * B_{radbio} - (\mu + \delta) * I_{radbio} - c_{Iradb} * I_{radbio} + (1/X_{ai}) * I_{radabio} - (1/(X_b - X_{ai})) * I_{radbio}$$

;rdbio

$$d/dt(L_{rdbio}) = \beta * S_{dbio} * T_{Irb}/N_0 - (\mu + \gamma) * L_{rdbio} + (1/X_{ai}) * L_{rdbabio} - (1/(X_b - X_{ai})) * L_{rdbio}$$

$$d/dt(B_{rdbio}) = \gamma * L_{rdbio} - (\mu + \sigma) * B_{rdbio} - c_{Brbdb} * B_{rdbio} + (1/X_{ai}) * B_{rdbabio} - (1/(X_b - X_{ai})) * B_{rdbio} - \tau_{ab} * B_{rdbio}$$

$$d/dt(I_{rdbio}) = \sigma * B_{rdbio} - (\mu + \delta) * I_{rdbio} - c_{Irbdb} * I_{rdbio} + (1/X_{ai}) * I_{rdbabio} - (1/(X_b - X_{ai})) * I_{rdbio} - \tau_{ab} * I_{rdbio}$$

$$N_{dbio} = S_{dbio} + L_{rodbio} + B_{rodbio} + I_{rodbio} + L_{radbio} + B_{radbio} + I_{radbio} + L_{rdbio} + B_{rdbio} + I_{rdbio}$$

;Intervention 2

;MSAT using atovaquone/proguanil

; N<sub>dvgpi2</sub>, N<sub>dvgi2</sub>, N<sub>dvi2</sub>, N<sub>doi2</sub>

;Box N<sub>dvgpi2</sub>

init S<sub>dvgpi2</sub> = 0

;init B<sub>dvgpi2</sub> = B<sub>dvgpi2</sub>0

;init L<sub>dvgpi2</sub> = L<sub>dvgpi2</sub>0

;init I<sub>dvgpi2</sub> = I<sub>dvgpi2</sub>0

$$L_{dvgpi2} = L_{rodvmpi2} + L_{radvmpi2} + L_{rbdvmpi2}$$

$$B_{dvgpi2} = B_{rodvmpi2} + B_{radvmpi2} + B_{rbdvmpi2}$$

$$I_{dvgpi2} = I_{rodvmpi2} + I_{radvmpi2} + I_{rbdvmpi2}$$

init L<sub>rodvmpi2</sub> = 0

init L<sub>radvmpi2</sub> = 0

init L<sub>rbdvmpi2</sub> = 0

init B<sub>rodvmpi2</sub> = 0

init B<sub>radvgpi2</sub> = 0  
 init B<sub>rbdvgpi2</sub> = 0  
 init I<sub>rodvgpi2</sub> = 0  
 init I<sub>radvgpi2</sub> = 0  
 init I<sub>rbdvgpi2</sub> = 0

$$\begin{aligned}
 d/dt(S_{dvgpi2}) = & -\mu * S_{dvgpi2} - \beta * S_{dvgpi2} * T_{Iro}/N_0 + \delta * I_{rodvgpi2} + c_{Ldvg} * L_{rodvgpi2} + c_{Bdvg} * B_{rodvgpi2} + \\
 & c_{Idvg} * I_{rodvgpi2} - \beta * S_{dvgpi2} * T_{Ira}/N_0 + \delta * I_{radvgpi2} + c_{Ldvg} * L_{radvgpi2} + c_{Bdvg} * B_{radvgpi2} + c_{Idvg} * I_{radvgpi2} - \\
 & \beta * S_{dvgpi2} * T_{Irb}/N_0 + \delta * I_{rbdvgpi2} + c_{Ldvg} * L_{rbdvgpi2} + c_{Bdvg} * B_{rbdvgpi2} + c_{Idvg} * I_{rbdvgpi2} - (1/X_p) * S_{dvgpi2} + \\
 & c_{Lp} * (L_{rodvgpi2} + L_{radvgpi2} + L_{rbdvgpi2}) + c_{Ip} * (I_{rodvgpi2} + I_{radvgpi2} + I_{rbdvgpi2})
 \end{aligned}$$

;rodvgpi2

$$\begin{aligned}
 d/dt(L_{rodvgpi2}) = & \beta * S_{dvgpi2} * T_{Iro}/N_0 - (\mu + \gamma) * L_{rodvgpi2} - (1/X_p) * L_{rodvgpi2} - c_{Lp} * L_{rodvgpi2} - c_{Ldvg} * L_{rodvgpi2} \\
 d/dt(B_{rodvgpi2}) = & \gamma * L_{rodvgpi2} - (\mu + \sigma) * B_{rodvgpi2} + \tau_2 * B_{rodoio} + \tau_2 * B_{rodaio} - (1/X_p) * B_{rodvgpi2} - \\
 & c_{Bdvg} * B_{rodvgpi2} + \tau_2 * B_{rodoi2} + \tau_2 * B_{rodabi2} + \tau_2 * B_{rodbi2} \\
 d/dt(I_{rodvgpi2}) = & \sigma * B_{rodvgpi2} - (\mu + \delta) * I_{rodvgpi2} + \tau_2 * I_{rodoio} + \tau_2 * I_{rodaio} - (1/X_p) * I_{rodvgpi2} - c_{Ip} * I_{rodvgpi2} - \\
 & c_{Idvg} * I_{rodvgpi2} + \tau_2 * I_{rodoi2} + \tau_2 * I_{rodabi2} + \tau_2 * I_{rodbi2}
 \end{aligned}$$

;radvgpi2

$$\begin{aligned}
 d/dt(L_{radvgpi2}) = & \beta * S_{dvgpi2} * T_{Ira}/N_0 - (\mu + \gamma) * L_{radvgpi2} - (1/X_p) * L_{radvgpi2} - c_{Lp} * L_{radvgpi2} - c_{Ldvg} * L_{radvgpi2} \\
 d/dt(B_{radvgpi2}) = & \gamma * L_{radvgpi2} - (\mu + \sigma) * B_{radvgpi2} + \tau_2 * B_{radoio} + \tau_2 * B_{radaio} - (1/X_p) * B_{radvgpi2} - \\
 & c_{Bdvg} * B_{radvgpi2} + \tau_2 * B_{radoi2} + \tau_2 * B_{radabi2} + \tau_2 * B_{radbi2} \\
 d/dt(I_{radvgpi2}) = & \sigma * B_{radvgpi2} - (\mu + \delta) * I_{radvgpi2} + \tau_2 * I_{radoio} + \tau_2 * I_{radaio} - (1/X_p) * I_{radvgpi2} - c_{Ip} * I_{radvgpi2} - \\
 & c_{Idvg} * I_{radvgpi2} + \tau_2 * I_{radoi2} + \tau_2 * I_{radabi2} + \tau_2 * I_{radbi2}
 \end{aligned}$$

;rbdvgpi2

$$\begin{aligned}
 d/dt(L_{rbdvgpi2}) = & \beta * S_{dvgpi2} * T_{Irb}/N_0 - (\mu + \gamma) * L_{rbdvgpi2} - (1/X_p) * L_{rbdvgpi2} - c_{Lp} * L_{rbdvgpi2} - c_{Ldvg} * L_{rbdvgpi2} \\
 d/dt(B_{rbdvgpi2}) = & \gamma * L_{rbdvgpi2} - (\mu + \sigma) * B_{rbdvgpi2} + \tau_2 * B_{rbdoio} + \tau_2 * B_{rbdaio} - (1/X_p) * B_{rbdvgpi2} - \\
 & c_{Bdvg} * B_{rbdvgpi2} + \tau_2 * B_{rbdoi2} + \tau_2 * B_{rbdabi2} + \tau_2 * B_{rbdbi2} \\
 d/dt(I_{rbdvgpi2}) = & \sigma * B_{rbdvgpi2} - (\mu + \delta) * I_{rbdvgpi2} + \tau_2 * I_{rbdoio} + \tau_2 * I_{rbdaio} - (1/X_p) * I_{rbdvgpi2} - c_{Ip} * I_{rbdvgpi2} - \\
 & c_{Idvg} * I_{rbdvgpi2} + \tau_2 * I_{rbdoi2} + \tau_2 * I_{rbdabi2} + \tau_2 * I_{rbdbi2}
 \end{aligned}$$

$$\begin{aligned}
 N_{dvgpi2} = & S_{dvgpi2} + L_{rodvgpi2} + B_{rodvgpi2} + I_{rodvgpi2} + L_{radvgpi2} + B_{radvgpi2} + I_{radvgpi2} + L_{rbdvgpi2} + B_{rbdvgpi2} \\
 & + I_{rbdvgpi2}
 \end{aligned}$$

;Box N<sub>dvgi2</sub>

init S<sub>dvgi2</sub> = 0  
 ;init B<sub>dvgi2</sub> = B<sub>dvgi2</sub>0  
 ;init L<sub>dvgi2</sub> = L<sub>dvgi2</sub>0

;init I<sub>dvgi2</sub> = I<sub>dvgi2</sub>0

$$L_{dvgi2} = L_{rodvgi2} + L_{radvgi2} + L_{rbdvgi2}$$

$$B_{dvgi2} = B_{rodvgi2} + B_{radvgi2} + B_{rbdvgi2}$$

$$I_{dvgi2} = I_{rodvgi2} + I_{radvgi2} + I_{rbdvgi2}$$

$$\text{init } L_{rodvgi2} = 0$$

$$\text{init } L_{radvgi2} = 0$$

$$\text{init } L_{rbdvgi2} = 0$$

$$\text{init } B_{rodvgi2} = 0$$

$$\text{init } B_{radvgi2} = 0$$

$$\text{init } B_{rbdvgi2} = 0$$

$$\text{init } I_{rodvgi2} = 0$$

$$\text{init } I_{radvgi2} = 0$$

$$\text{init } I_{rbdvgi2} = 0$$

$$\begin{aligned} d/dt(S_{dvgi2}) = & -\mu * S_{dvgi2} - \beta * S_{dvgi2} * T_{Iro}/N_0 + \delta * I_{rodvgi2} - \beta * S_{dvgi2} * T_{Ira}/N_0 + \delta * I_{radvgi2} - \\ & \beta * S_{dvgi2} * T_{Irb}/N_0 + \delta * I_{rbdvgi2} + (1/X_p) * S_{dvgi2} - (1/(X_g - X_p)) * S_{dvgi2} + c_{Ldv} * (L_{rodvgi2} + L_{radvgi2} + \\ & L_{rbdvgi2}) + c_{Bdv} * (B_{rodvgi2} + B_{radvgi2} + B_{rbdvgi2}) + c_{Idv} * (I_{rodvgi2} + I_{radvgi2} + I_{rbdvgi2}) \end{aligned}$$

;rodvgi2

$$\begin{aligned} d/dt(L_{rodvgi2}) = & \beta * S_{dvgi2} * T_{Iro}/N_0 - (\mu + \gamma) * L_{rodvgi2} + (1/X_p) * L_{rodvmpi2} - (1/(X_g - X_p)) * L_{rodvgi2} - \\ & c_{Ldv} * L_{rodvgi2} \end{aligned}$$

$$d/dt(B_{rodvgi2}) = \gamma * L_{rodvgi2} - (\mu + \sigma) * B_{rodvgi2} + (1/X_p) * B_{rodvmpi2} - (1/(X_g - X_p)) * B_{rodvgi2} - c_{Bdv} * B_{rodvgi2}$$

$$d/dt(I_{rodvgi2}) = \sigma * B_{rodvgi2} - (\mu + \delta) * I_{rodvgi2} + (1/X_p) * I_{rodvmpi2} - (1/(X_g - X_p)) * I_{rodvgi2} - c_{Idv} * I_{rodvgi2}$$

;radvgi2

$$\begin{aligned} d/dt(L_{radvgi2}) = & \beta * S_{dvgi2} * T_{Ira}/N_0 - (\mu + \gamma) * L_{radvgi2} + (1/X_p) * L_{radvmpi2} - (1/(X_g - X_p)) * L_{radvgi2} - \\ & c_{Ldv} * L_{radvgi2} \end{aligned}$$

$$d/dt(B_{radvgi2}) = \gamma * L_{radvgi2} - (\mu + \sigma) * B_{radvgi2} + (1/X_p) * B_{radvmpi2} - (1/(X_g - X_p)) * B_{radvgi2} - c_{Bdv} * B_{radvgi2}$$

$$d/dt(I_{radvgi2}) = \sigma * B_{radvgi2} - (\mu + \delta) * I_{radvgi2} + (1/X_p) * I_{radvmpi2} - (1/(X_g - X_p)) * I_{radvgi2} - c_{Idv} * I_{radvgi2}$$

;rbdvgi2

$$\begin{aligned} d/dt(L_{rbdvgi2}) = & \beta * S_{dvgi2} * T_{Irb}/N_0 - (\mu + \gamma) * L_{rbdvgi2} + (1/X_p) * L_{rbdvmpi2} - (1/(X_g - X_p)) * L_{rbdvgi2} - \\ & c_{Ldv} * L_{rbdvgi2} \end{aligned}$$

$$d/dt(B_{rbdvgi2}) = \gamma * L_{rbdvgi2} - (\mu + \sigma) * B_{rbdvgi2} + (1/X_p) * B_{rbdvmpi2} - (1/(X_g - X_p)) * B_{rbdvgi2} - c_{Bdv} * B_{rbdvgi2}$$

$$d/dt(I_{rbdvgi2}) = \sigma * B_{rbdvgi2} - (\mu + \delta) * I_{rbdvgi2} + (1/X_p) * I_{rbdvmpi2} - (1/(X_g - X_p)) * I_{rbdvgi2} - c_{Idv} * I_{rbdvgi2}$$

$$N_{dvgi2} = S_{dvgi2} + L_{rodvgi2} + B_{rodvgi2} + I_{rodvgi2} + L_{radvgi2} + B_{radvgi2} + I_{radvgi2} + L_{rbdvgi2} + B_{rbdvgi2} + I_{rbdvgi2}$$

;Box N<sub>dvi2</sub>

init S<sub>dvi2</sub> = 0

;init B<sub>dvi2</sub> = B<sub>dvi2</sub>0

;init L<sub>dvi2</sub> = L<sub>dvi2</sub>0

;init I<sub>dvi2</sub> = I<sub>dvi2</sub>0

L<sub>dvi2</sub> = L<sub>rodvi2</sub>+L<sub>radvi2</sub>+L<sub>rbdvi2</sub>

B<sub>dvi2</sub> = B<sub>rodvi2</sub>+B<sub>radvi2</sub>+B<sub>rbdvi2</sub>

I<sub>dvi2</sub> = I<sub>rodvi2</sub>+I<sub>radvi2</sub>+I<sub>rbdvi2</sub>

init L<sub>rodvi2</sub> = 0

init L<sub>radvi2</sub> = 0

init L<sub>rbdvi2</sub> = 0

init B<sub>rodvi2</sub> = 0

init B<sub>radvi2</sub> = 0

init B<sub>rbdvi2</sub> = 0

init I<sub>rodvi2</sub> = 0

init I<sub>radvi2</sub> = 0

init I<sub>rbdvi2</sub> = 0

$$\begin{aligned} d/dt(S_{dvi2}) = & -\mu * S_{dvi2} - \beta * S_{dvi2} * T_{Iro}/N_0 + \delta * I_{rodvi2} - \beta * S_{dvi2} * T_{Ira}/N_0 + \delta * I_{radvi2} - \beta * S_{dvi2} * T_{Irb}/N_0 + \\ & \delta * I_{rbdvi2} + (1/(X_g - X_p)) * S_{dvgi2} - (1/(X_v - X_g - X_p)) * S_{dvi2} + c_{Ldv} * (L_{rodvi2} + L_{radvi2} + L_{rbdvi2}) + \\ & c_{Bdv} * (B_{rodvi2} + B_{radvi2} + B_{rbdvi2}) + c_{Idv} * (I_{rodvi2} + I_{radvi2} + I_{rbdvi2}) \end{aligned}$$

;rodvi2

$$d/dt(L_{rodvi2}) = \beta * S_{dvi2} * T_{Iro}/N_0 - (\mu + \gamma) * L_{rodvi2} - c_{Ldv} * L_{rodvi2} + (1/(X_g - X_p)) * L_{rodvgi2} - (1/(X_v - X_g - X_p)) * L_{rodvi2}$$

$$d/dt(B_{rodvi2}) = \gamma * L_{rodvi2} - (\mu + \sigma) * B_{rodvi2} - c_{Bdv} * B_{rodvi2} + (1/(X_g - X_p)) * B_{rodvgi2} - (1/(X_v - X_g - X_p)) * B_{rodvi2}$$

$$d/dt(I_{rodvi2}) = \sigma * B_{rodvi2} - (\mu + \delta) * I_{rodvi2} - c_{Idv} * I_{rodvi2} + (1/(X_g - X_p)) * I_{rodvgi2} - (1/(X_v - X_g - X_p)) * I_{rodvi2}$$

;radvi2

$$d/dt(L_{radvi2}) = \beta * S_{dvi2} * T_{Ira}/N_0 - (\mu + \gamma) * L_{radvi2} - c_{Ldv} * L_{radvi2} + (1/(X_g - X_p)) * L_{radvgi2} - (1/(X_v - X_g - X_p)) * L_{radvi2}$$

$$d/dt(B_{radvi2}) = \gamma * L_{radvi2} - (\mu + \sigma) * B_{radvi2} - c_{Bdv} * B_{radvi2} + (1/(X_g - X_p)) * B_{radvgi2} - (1/(X_v - X_g - X_p)) * B_{radvi2}$$

$$d/dt(I_{radvi2}) = \sigma * B_{radvi2} - (\mu + \delta) * I_{radvi2} - c_{Idv} * I_{radvi2} + (1/(X_g - X_p)) * I_{radvgi2} - (1/(X_v - X_g - X_p)) * I_{radvi2}$$

;rbdvi2

$$\begin{aligned} d/dt(L_{rbdvi2}) &= \beta * S_{dvi2} * T_{Irb}/N_0 - (\mu + \gamma) * L_{rbdvi2} - c_{Ldv} * L_{rbdvi2} + (1/(X_g - X_p)) * L_{rbdvgi2} - (1/(X_v - X_g - X_p)) * L_{rbdvi2} \\ d/dt(B_{rbdvi2}) &= \gamma * L_{rbdvi2} - (\mu + \sigma) * B_{rbdvi2} - c_{Bdv} * B_{rbdvi2} + (1/(X_g - X_p)) * B_{rbdvgi2} - (1/(X_v - X_g - X_p)) * B_{rbdvi2} \\ d/dt(I_{rbdvi2}) &= \sigma * B_{rbdvi2} - (\mu + \delta) * I_{rbdvi2} - c_{Idv} * I_{rbdvi2} + (1/(X_g - X_p)) * I_{rbdvgi2} - (1/(X_v - X_g - X_p)) * I_{rbdvi2} \end{aligned}$$

$$N_{dvi2} = S_{dvi2} + L_{rodoi2} + B_{rodoi2} + I_{rodoi2} + L_{radvi2} + B_{radvi2} + I_{radvi2} + L_{rbdvi2} + B_{rbdvi2} + I_{rbdvi2}$$

;Box N<sub>doi2</sub>

$$\text{init } S_{doi2} = 0$$

$$I_{doi2} = 0$$

$$L_{doi2} = L_{rodoi2} + L_{radoi2} + L_{rbdoi2}$$

$$B_{doi2} = B_{rodoi2} + B_{radoi2} + B_{rbdoi2}$$

$$I_{doi2} = I_{rodoi2} + I_{radoi2} + I_{rbdoi2}$$

$$\text{init } L_{rodoi2} = 0$$

$$\text{init } L_{radoi2} = 0$$

$$\text{init } L_{rbdoi2} = 0$$

$$\text{init } B_{rodoi2} = 0$$

$$\text{init } B_{radoi2} = 0$$

$$\text{init } B_{rbdoi2} = 0$$

$$\text{init } I_{rodoi2} = 0$$

$$\text{init } I_{radoi2} = 0$$

$$\text{init } I_{rbdoi2} = 0$$

$$\begin{aligned} d/dt(S_{doi2}) &= -\mu * S_{doi2} - \beta * S_{doi2} * T_{Iro}/N_0 + \delta * I_{rodoi2} + c_{Brodo} * B_{rodoi2} + c_{Irodo} * I_{rodoi2} - \beta * S_{doi2} * T_{Ira}/N_0 + \\ &\delta * I_{radoi2} + c_{Brado} * B_{radoi2} + c_{Irado} * I_{radoi2} - \beta * S_{doi2} * T_{Irb}/N_0 + \delta * I_{rbdoi2} + c_{Brbdo} * B_{rbdoi2} + c_{Irbdo} * I_{rbdoi2} + \\ &(1/(X_v - X_g - X_p)) * S_{dvi2} + 1/(X_b - X_{ai}) * S_{dbi2} + (1/X_{ao}) * S_{dai2} \end{aligned}$$

;rodoi2

$$d/dt(L_{rodoi2}) = \beta * S_{doi2} * T_{Iro}/N_0 - (\mu + \gamma) * L_{rodoi2} + (1/(X_v - X_g - X_p)) * L_{rodvi2} + 1/(X_b - X_{ai}) * L_{rodbi2} + (1/X_{ao}) * L_{rodai2}$$

$$d/dt(B_{rodoi2}) = \gamma * L_{rodoi2} - (\mu + \sigma) * B_{rodoi2} - c_{Brodo} * B_{rodoi2} + (1/(X_v - X_g - X_p)) * B_{rodvi2} - \tau_{abi2} * B_{rodoi2} + 1/(X_b - X_{ai}) * B_{rodbi2} - \tau_{ai2} * B_{rodoi2} + (1/X_{ao}) * B_{rodai2} - \tau_2 * B_{rodoi2}$$

$$d/dt(I_{rodoi2}) = \sigma * B_{rodoi2} - (\mu + \delta) * I_{rodoi2} - c_{Irodo} * I_{rodoi2} + (1/(X_v - X_g - X_p)) * I_{rodvi2} - \tau_{abi2} * I_{rodoi2} + 1/(X_b - X_{ai}) * I_{rodbi2} - \tau_{ai2} * I_{rodoi2} + (1/X_{ao}) * I_{rodai2} - \tau_2 * I_{rodoi2}$$

;radoi2

$$\begin{aligned}
d/dt(L_{\text{radoi}2}) &= \beta * S_{\text{doi}2} * T_{\text{Ira}}/N_0 - (\mu + \gamma) * L_{\text{radoi}2} + (1/(X_v - X_g - X_p)) * L_{\text{radvi}2} + 1/(X_b - X_{\text{ai}}) * L_{\text{radbi}2} + \\
&(1/X_{\text{ao}}) * L_{\text{radai}2} \\
d/dt(B_{\text{radoi}2}) &= \gamma * L_{\text{radoi}2} - (\mu + \sigma) * B_{\text{radoi}2} - c_{\text{Brado}} * B_{\text{radoi}2} + (1/(X_v - X_g - X_p)) * B_{\text{radvi}2} - \tau_{\text{abi}2} * B_{\text{radoi}2} + \\
&1/(X_b - X_{\text{ai}}) * B_{\text{radbi}2} - \tau_{\text{ai}2} * B_{\text{radoi}2} + (1/X_{\text{ao}}) * B_{\text{radai}2} - \tau_2 * B_{\text{radoi}2} \\
d/dt(I_{\text{radoi}2}) &= \sigma * B_{\text{radoi}2} - (\mu + \delta) * I_{\text{radoi}2} - c_{\text{Irado}} * I_{\text{radoi}2} + (1/(X_v - X_g - X_p)) * I_{\text{radvi}2} - \tau_{\text{abi}2} * I_{\text{radoi}2} + 1/(X_b - \\
&X_{\text{ai}}) * I_{\text{radbi}2} - \tau_{\text{ai}2} * I_{\text{radoi}2} + (1/X_{\text{ao}}) * I_{\text{radai}2} - \tau_2 * I_{\text{radoi}2}
\end{aligned}$$

;rbdoi2

$$\begin{aligned}
d/dt(L_{\text{rbdoi}2}) &= \beta * S_{\text{doi}2} * T_{\text{Irb}}/N_0 - (\mu + \gamma) * L_{\text{rbdoi}2} + (1/(X_v - X_g - X_p)) * L_{\text{rbdvi}2} + 1/(X_b - X_{\text{ai}}) * L_{\text{rbdbi}2} + \\
&(1/X_{\text{ao}}) * L_{\text{rbdai}2} \\
d/dt(B_{\text{rbdoi}2}) &= \gamma * L_{\text{rbdoi}2} - (\mu + \sigma) * B_{\text{rbdoi}2} - c_{\text{Brbdo}} * B_{\text{rbdoi}2} + (1/(X_v - X_g - X_p)) * B_{\text{rbdvi}2} - \tau_{\text{abi}2} * B_{\text{rbdoi}2} + \\
&1/(X_b - X_{\text{ai}}) * B_{\text{rbdbi}2} - \tau_{\text{ai}2} * B_{\text{rbdoi}2} + (1/X_{\text{ao}}) * B_{\text{rbdai}2} - \tau_2 * B_{\text{rbdoi}2} \\
d/dt(I_{\text{rbdoi}2}) &= \sigma * B_{\text{rbdoi}2} - (\mu + \delta) * I_{\text{rbdoi}2} - c_{\text{Irbdo}} * I_{\text{rbdoi}2} + (1/(X_v - X_g - X_p)) * I_{\text{rbdvi}2} - \tau_{\text{abi}2} * I_{\text{rbdoi}2} + 1/(X_b - \\
&X_{\text{ai}}) * I_{\text{rbdbi}2} - \tau_{\text{ai}2} * I_{\text{rbdoi}2} + (1/X_{\text{ao}}) * I_{\text{rbdai}2} - \tau_2 * I_{\text{rbdoi}2}
\end{aligned}$$

$$N_{\text{doi}2} = S_{\text{doi}2} + L_{\text{rodoi}2} + B_{\text{rodoi}2} + I_{\text{rodoi}2} + L_{\text{radoi}2} + B_{\text{radoi}2} + I_{\text{radoi}2} + L_{\text{rbdoi}2} + B_{\text{rbdoi}2} + I_{\text{rbdoi}2}$$

;Treatment with artesunate in intervention 2

; N<sub>dai2</sub>

;Box N<sub>dai2</sub>

init S<sub>dai2</sub> = 0

;init B<sub>dai2</sub> = B<sub>dai2</sub>0

;init L<sub>dai2</sub> = L<sub>dai2</sub>0

;init I<sub>dai2</sub> = I<sub>dai2</sub>0

L<sub>dai2</sub> = L<sub>rodoi2</sub> + L<sub>radai2</sub> + L<sub>rbdai2</sub>

B<sub>dai2</sub> = B<sub>rodoi2</sub> + B<sub>radai2</sub> + B<sub>rbdai2</sub>

I<sub>dai2</sub> = I<sub>rodoi2</sub> + I<sub>radai2</sub> + I<sub>rbdai2</sub>

init L<sub>rodoi2</sub> = 0

init L<sub>radai2</sub> = 0

init L<sub>rbdai2</sub> = 0

init B<sub>rodoi2</sub> = 0

init B<sub>radai2</sub> = 0

init B<sub>rbdai2</sub> = 0

init I<sub>rodoi2</sub> = 0

init I<sub>radai2</sub> = 0

init I<sub>rbdai2</sub> = 0

$$\begin{aligned}
d/dt(S_{\text{dai}2}) &= - \mu * S_{\text{dai}2} - \beta * S_{\text{dai}2} * T_{\text{Iro}}/N_0 + \delta * I_{\text{rodoi}2} + c_{\text{Broda}} * B_{\text{rodoi}2} + c_{\text{Iroda}} * I_{\text{rodoi}2} - \beta * S_{\text{dai}2} * T_{\text{Ira}}/N_0 + \\
&\delta * I_{\text{radai}2} + c_{\text{Brada}} * B_{\text{radai}2} + c_{\text{Irada}} * I_{\text{radai}2} - \beta * S_{\text{dai}2} * T_{\text{Irb}}/N_0 + \delta * I_{\text{rbdai}2} + c_{\text{Brbda}} * B_{\text{rbdai}2} + c_{\text{Irbda}} * I_{\text{rbdai}2} - \\
&(1/X_{\text{ao}}) * S_{\text{dai}2}
\end{aligned}$$



;rodai2

$$d/dt(L_{rodai2}) = \beta * S_{dai2} * T_{Iro}/N_0 - (\mu + \gamma) * L_{rodai2} - (1/X_{ao}) * L_{rodai2}$$

$$d/dt(B_{rodai2}) = \gamma * L_{rodai2} - (\mu + \sigma) * B_{rodai2} - c_{Broda} * B_{rodai2} + \tau_{ai2} * B_{rodoi2} - (1/X_{ao}) * B_{rodai2}$$

$$d/dt(I_{rodai2}) = \sigma * B_{rodai2} - (\mu + \delta) * I_{rodai2} - c_{Iroda} * I_{rodai2} + \tau_{ai2} * I_{rodoi2} - (1/X_{ao}) * I_{rodai2}$$

;radai2

$$d/dt(L_{radai2}) = \beta * S_{dai2} * T_{Ira}/N_0 - (\mu + \gamma) * L_{radai2} - (1/X_{ao}) * L_{radai2}$$

$$d/dt(B_{radai2}) = \gamma * L_{radai2} - (\mu + \sigma) * B_{radai2} - c_{Brada} * B_{radai2} + \tau_{ai2} * B_{radoi2} - (1/X_{ao}) * B_{radai2}$$

$$d/dt(I_{radai2}) = \sigma * B_{radai2} - (\mu + \delta) * I_{radai2} - c_{Irada} * I_{radai2} + \tau_{ai2} * I_{radoi2} - (1/X_{ao}) * I_{radai2}$$

;rbdai2

$$d/dt(L_{rbdai2}) = \beta * S_{dai2} * T_{Irb}/N_0 - (\mu + \gamma) * L_{rbdai2} - (1/X_{ao}) * L_{rbdai2}$$

$$d/dt(B_{rbdai2}) = \gamma * L_{rbdai2} - (\mu + \sigma) * B_{rbdai2} - c_{Brbda} * B_{rbdai2} + \tau_{ai2} * B_{rbdoi2} - (1/X_{ao}) * B_{rbdai2}$$

$$d/dt(I_{rbdai2}) = \sigma * B_{rbdai2} - (\mu + \delta) * I_{rbdai2} - c_{Irbda} * I_{rbdai2} + \tau_{ai2} * I_{rbdoi2} - (1/X_{ao}) * I_{rbdai2}$$

$$N_{dai2} = S_{dai2} + L_{rodai2} + B_{rodai2} + I_{rodai2} + L_{radai2} + B_{radai2} + I_{radai2} + L_{rbdai2} + B_{rbdai2} + I_{rbdai2}$$

;Treatment with ACT (artesunate + piperaquine) during intervention 2

; N<sub>dabi2</sub>, N<sub>dai2</sub>

;Box N<sub>dabi2</sub>

$$\text{init } S_{dabi2} = 0$$

$$\text{;init } B_{dabi2} = B_{dabi2}0$$

$$\text{;init } L_{dabi2} = L_{dabi2}0$$

$$\text{;init } I_{dabi2} = I_{dabi2}0$$

$$L_{dabi2} = L_{rodabi2} + L_{radabi2} + L_{rbdabi2}$$

$$B_{dabi2} = B_{rodabi2} + B_{radabi2} + B_{rbdabi2}$$

$$I_{dabi2} = I_{rodabi2} + I_{radabi2} + I_{rbdabi2}$$

$$\text{init } L_{rodabi2} = 0$$

$$\text{init } L_{radabi2} = 0$$

$$\text{init } L_{rbdabi2} = 0$$

$$\text{init } B_{rodabi2} = 0$$

$$\text{init } B_{radabi2} = 0$$

$$\text{init } B_{rbdabi2} = 0$$

$$\text{init } I_{rodabi2} = 0$$

$$\text{init } I_{radabi2} = 0$$

$$\text{init } I_{rbdabi2} = 0$$

$$\begin{aligned} d/dt(S_{dabi2}) = & -\mu * S_{dabi2} - \beta * S_{dabi2} * T_{Iro}/N_0 + \delta * I_{rodabi2} + c_{Brodab} * B_{rodabi2} + c_{Irodab} * I_{rodabi2} - \\ & \beta * S_{dabi2} * T_{Ira}/N_0 + \delta * I_{radabi2} + c_{Bradab} * B_{radabi2} + c_{Iradab} * I_{radabi2} - \beta * S_{dabi2} * T_{Irb}/N_0 + \delta * I_{rbdabi2} + \\ & c_{Brbdab} * B_{rbdabi2} + c_{Irbdab} * I_{rbdabi2} - (1/X_{ai} * S_{dabi2}) \end{aligned}$$

;rodabi2

$$\begin{aligned} d/dt(L_{rodabi2}) = & \beta * S_{dabi2} * T_{Iro}/N_0 - (\mu + \gamma) * L_{rodabi2} - (1/X_{ai}) * L_{rodabi2} \\ d/dt(B_{rodabi2}) = & \gamma * L_{rodabi2} - (\mu + \sigma) * B_{rodabi2} - c_{Brodab} * B_{rodabi2} - (1/X_{ai}) * B_{rodabi2} + \tau_{abi2} * B_{rodoi2} - \\ & \tau_2 * B_{rodabi2} \\ d/dt(I_{rodabi2}) = & \sigma * B_{rodabi2} - (\mu + \delta) * I_{rodabi2} - c_{Irodab} * I_{rodabi2} - (1/X_{ai}) * I_{rodabi2} + \tau_{abi2} * I_{rodoi2} - \tau_2 * I_{rodabi2} \end{aligned}$$

;radabi2

$$\begin{aligned} d/dt(L_{radabi2}) = & \beta * S_{dabi2} * T_{Ira}/N_0 - (\mu + \gamma) * L_{radabi2} - (1/X_{ai}) * L_{radabi2} \\ d/dt(B_{radabi2}) = & \gamma * L_{radabi2} - (\mu + \sigma) * B_{radabi2} - c_{Bradab} * B_{radabi2} - (1/X_{ai}) * B_{radabi2} + \tau_{abi2} * B_{radoi2} - \\ & \tau_2 * B_{radabi2} \\ d/dt(I_{radabi2}) = & \sigma * B_{radabi2} - (\mu + \delta) * I_{radabi2} - c_{Iradab} * I_{radabi2} - (1/X_{ai}) * I_{radabi2} + \tau_{abi2} * I_{radoi2} - \tau_2 * I_{radabi2} \end{aligned}$$

;rbdabi2

$$\begin{aligned} d/dt(L_{rbdabi2}) = & \beta * S_{dabi2} * T_{Irb}/N_0 - (\mu + \gamma) * L_{rbdabi2} - (1/X_{ai}) * L_{rbdabi2} \\ d/dt(B_{rbdabi2}) = & \gamma * L_{rbdabi2} - (\mu + \sigma) * B_{rbdabi2} - c_{Brbdab} * B_{rbdabi2} + \tau_{ab} * B_{rdbi2} - (1/X_{ai}) * B_{rbdabi2} + \\ & \tau_{abi2} * B_{rbdoi2} - \tau_2 * B_{rbdabi2} \\ d/dt(I_{rbdabi2}) = & \sigma * B_{rbdabi2} - (\mu + \delta) * I_{rbdabi2} - c_{Irbdab} * I_{rbdabi2} + \tau_{ab} * I_{rdbi2} - (1/X_{ai}) * I_{rbdabi2} + \tau_{abi2} * I_{rbdoi2} - \\ & \tau_2 * I_{rbdabi2} \end{aligned}$$

$$N_{dabi2} = S_{dabi2} + L_{rodabi2} + B_{rodabi2} + I_{rodabi2} + L_{radabi2} + B_{radabi2} + I_{radabi2} + L_{rbdabi2} + B_{rbdabi2} + I_{rbdabi2}$$

;Box N<sub>dabi2</sub>

$$\text{init } S_{dbi2} = 0$$

$$\text{;init } B_{dbi2} = B_{dbi2}0$$

$$\text{;init } L_{dbi2} = L_{dbi2}0$$

$$\text{;init } I_{dbi2} = I_{dbi2}0$$

$$L_{dbi2} = L_{rodabi2} + L_{radabi2} + L_{rbdabi2}$$

$$B_{dbi2} = B_{rodabi2} + B_{radabi2} + B_{rbdabi2}$$

$$I_{dbi2} = I_{rodabi2} + I_{radabi2} + I_{rbdabi2}$$

$$\text{init } L_{rodabi2} = 0$$

$$\text{init } L_{radabi2} = 0$$

$$\text{init } L_{rbdabi2} = 0$$

$$\text{init } B_{rodabi2} = 0$$

$$\text{init } B_{radabi2} = 0$$

init B<sub>rdbi2</sub> = 0  
 init I<sub>rodbi2</sub> = 0  
 init I<sub>radbi2</sub> = 0  
 init I<sub>rdbi2</sub> = 0

$$\begin{aligned}
 d/dt(S_{dbi2}) = & -\mu * S_{dbi2} - \beta * S_{dbi2} * T_{Iro}/N_0 + \delta * I_{rodbi2} + c_{Brodb} * B_{rodbi2} + c_{Irodb} * I_{rodbi2} - \beta * S_{dbi2} * T_{Ira}/N_0 + \\
 & \delta * I_{radbi2} + c_{Bradb} * B_{radbi2} + c_{Iradb} * I_{radbi2} - \beta * S_{dbi2} * T_{Irb}/N_0 + \delta * I_{rdbi2} + c_{Brbdb} * B_{rdbi2} + c_{Irbdb} * I_{rdbi2} + \\
 & (1/X_{ai} * S_{dabi2}) - 1/(X_b - X_{ai}) * S_{dbi2}
 \end{aligned}$$

;rodbi2

$$\begin{aligned}
 d/dt(L_{rodbi2}) = & \beta * S_{dbi2} * T_{Iro}/N_0 - (\mu + \gamma) * L_{rodbi2} + (1/X_{ai}) * L_{rodabi2} - 1/(X_b - X_{ai}) * L_{rodbi2} \\
 d/dt(B_{rodbi2}) = & \gamma * L_{rodbi2} - (\mu + \sigma) * B_{rodbi2} - c_{Brodb} * B_{rodbi2} + (1/X_{ai}) * B_{rodabi2} - 1/(X_b - X_{ai}) * B_{rodbi2} - \\
 & \tau_2 * B_{rodbi2} \\
 d/dt(I_{rodbi2}) = & \sigma * B_{rodbi2} - (\mu + \delta) * I_{rodbi2} - c_{Irodb} * I_{rodbi2} + (1/X_{ai}) * I_{rodabi2} - 1/(X_b - X_{ai}) * I_{rodbi2} - \tau_2 * I_{rodbi2}
 \end{aligned}$$

;radbi2

$$\begin{aligned}
 d/dt(L_{radbi2}) = & \beta * S_{dbi2} * T_{Ira}/N_0 - (\mu + \gamma) * L_{radbi2} + (1/X_{ai}) * L_{radabi2} - 1/(X_b - X_{ai}) * L_{radbi2} \\
 d/dt(B_{radbi2}) = & \gamma * L_{radbi2} - (\mu + \sigma) * B_{radbi2} - c_{Bradb} * B_{radbi2} + (1/X_{ai}) * B_{radabi2} - 1/(X_b - X_{ai}) * B_{radbi2} - \\
 & \tau_2 * B_{radbi2} \\
 d/dt(I_{radbi2}) = & \sigma * B_{radbi2} - (\mu + \delta) * I_{radbi2} - c_{Iradb} * I_{radbi2} + (1/X_{ai}) * I_{radabi2} - 1/(X_b - X_{ai}) * I_{radbi2} - \tau_2 * I_{radbi2}
 \end{aligned}$$

;rdbi2

$$\begin{aligned}
 d/dt(L_{rdbi2}) = & \beta * S_{dbi2} * T_{Irb}/N_0 - (\mu + \gamma) * L_{rdbi2} + (1/X_{ai}) * L_{rdbabi2} - 1/(X_b - X_{ai}) * L_{rdbi2} \\
 d/dt(B_{rdbi2}) = & \gamma * L_{rdbi2} - (\mu + \sigma) * B_{rdbi2} - c_{Brbdb} * B_{rdbi2} - \tau_{ab} * B_{rdbi2} + (1/X_{ai}) * B_{rdbabi2} - 1/(X_b - \\
 & X_{ai}) * B_{rdbi2} - \tau_2 * B_{rdbi2} \\
 d/dt(I_{rdbi2}) = & \sigma * B_{rdbi2} - (\mu + \delta) * I_{rdbi2} - c_{Irbdb} * I_{rdbi2} - \tau_{ab} * I_{rdbi2} + (1/X_{ai}) * I_{rdbabi2} - 1/(X_b - X_{ai}) * I_{rdbi2} - \\
 & \tau_2 * I_{rdbi2}
 \end{aligned}$$

$$N_{dbi2} = S_{dbi2} + L_{rodbi2} + B_{rodbi2} + I_{rodbi2} + L_{radbi2} + B_{radbi2} + I_{radbi2} + L_{rdbi2} + B_{rdbi2} + I_{rdbi2}$$

;CHECKS AND TOTALS

$$\begin{aligned}
 \text{check} = & N_0 - (N_{doio} + N_{daio} + N_{dabil} + N_{dbil} + N_{doi1} + N_{dabio} + N_{dbio} + N_{dai1a} + N_{dabi1a} + N_{dbi1a} + \\
 & N_{dvghi2} + N_{dvgi2} + N_{dvi2} + N_{doi2} + N_{dai2} + N_{dabi2} + N_{dbi2})
 \end{aligned}$$

$$\begin{aligned}
 T_N = & N_{doio} + N_{daio} + N_{dabil} + N_{dbil} + N_{doi1} + N_{dabio} + N_{dbio} + N_{dai1a} + N_{dabi1a} + N_{dbi1a} + N_{dvghi2} + \\
 & N_{dvgi2} + N_{dvi2} + N_{doi2} + N_{dai2} + N_{dabi2} + N_{dbi2}
 \end{aligned}$$

$$N_{ra} = (I_{radoio} + I_{radaio} + I_{radabi1} + I_{radbi1} + I_{radoi1} + I_{radabio} + I_{radbio} + I_{radai1a} + I_{radabi1a} + I_{radbi1a}) + (B_{radoio} + B_{radaio} + B_{radabi1} + B_{radbi1} + B_{radoi1} + B_{radabio} + B_{radbio} + B_{radai1a} + B_{radabi1a} + B_{radbi1a}) + (I_{radvgpi2} + I_{radvgi2} + I_{radvi2} + I_{radoi2} + I_{radai2} + I_{radabi2} + I_{radbi2}) + (B_{radvgpi2} + B_{radvgi2} + B_{radvi2} + B_{radoi2} + B_{radai2} + B_{radabi2} + B_{radbi2})$$

$$N_{rb} = (I_{rbdoio} + I_{rbdaio} + I_{rbdabi1} + I_{rbdbi1} + I_{rbdoi1} + I_{rbdabio} + I_{rdbbio} + I_{rbdai1a} + I_{rbdabi1a} + I_{rdbbi1a}) + (B_{rbdoio} + B_{rbdaio} + B_{rbdabi1} + B_{rbdbi1} + B_{rbdoi1} + B_{rbdabio} + B_{rdbbio} + B_{rbdai1a} + B_{rbdabi1a} + B_{rdbbi1a}) + (I_{rbdvgpi2} + I_{rbdvgi2} + I_{rbdvi2} + I_{rbdoi2} + I_{rbdai2} + I_{rbdabi2} + I_{rdbbi2}) + (B_{rbdvgpi2} + B_{rbdvgi2} + B_{rbdvi2} + B_{rbdoi2} + B_{rbdai2} + B_{rbdabi2} + B_{rdbbi2})$$

$$T_{IB} = (I_{doio} + I_{daio} + I_{dabi1} + I_{dbi1} + I_{doi1} + I_{dabio} + I_{dbio} + I_{dai1a} + I_{dabi1a} + I_{dbi1a}) + (B_{doio} + B_{daio} + B_{dabi1} + B_{dbi1} + B_{doi1} + B_{dabio} + B_{dbio} + B_{dai1a} + B_{dabi1a} + B_{dbi1a}) + (I_{dvvgpi2} + I_{dvgi2} + I_{dvi2} + I_{doi2} + I_{dai2} + I_{dabi2} + I_{dbi2}) + (B_{dvvgpi2} + B_{dvgi2} + B_{dvi2} + B_{doi2} + B_{dai2} + B_{dabi2} + B_{dbi2})$$

$$\beta = \text{amp} * ((1 - \text{bn}) * \beta_n) * \cos(2 * 3.14159 * (\text{time} - \pi)) + ((1 - \text{bn}) * \beta_n)$$

$$\pi = 0.5 ; \text{peak time for malaria transmission with } 0 = \text{January}$$

$$\text{amp} = 0.67 ; \text{amplitude of seasonal variation with value 0 to 1}$$

$$q = (\mu + \gamma) * (\mu + \sigma) * (\mu + \delta) / (\sigma * \gamma)$$

$$\text{cost}_a = 0 ; \text{cost of resistance to artesunate}$$

$$\text{cost}_b = 0 ; \text{cost of resistance to piperazine}$$

$$T_{Iro} = I_{rodoio} + I_{rodaio} + I_{rodabi1} + I_{rodbi1} + I_{rodoi1} + I_{rodabio} + I_{rodbio} + I_{rodai1a} + I_{rodabi1a} + I_{rodbi1a} + I_{rodvgpi2} + I_{rodvgi2} + I_{rodvi2} + I_{rodoi2} + I_{rodai2} + I_{rodabi2} + I_{rodbi2}$$

$$T_{Ira} = (1 - \text{cost}_a) * (I_{radoio} + I_{radaio} + I_{radabi1} + I_{radbi1} + I_{radoi1} + I_{radabio} + I_{radbio} + I_{radai1a} + I_{radabi1a} + I_{radbi1a} + I_{radvgpi2} + I_{radvgi2} + I_{radvi2} + I_{radoi2} + I_{radai2} + I_{radabi2} + I_{radbi2})$$

$$T_{Irb} = (1 - \text{cost}_b) * (I_{rbdoio} + I_{rbdaio} + I_{rbdabi1} + I_{rdbbi1} + I_{rbdoi1} + I_{rbdabio} + I_{rdbbio} + I_{rbdai1a} + I_{rbdabi1a} + I_{rdbbi1a} + I_{rbdvgpi2} + I_{rbdvgi2} + I_{rbdvi2} + I_{rbdoi2} + I_{rbdai2} + I_{rbdabi2} + I_{rdbbi2})$$

$$T_I = T_{Iro} + T_{Ira} + T_{Irb}$$

$$T_{ilcum}' = \tau_1 * (N_{doio} + N_{daio})$$

$$T_{ilcumcov} = (100 * T_{ilcum}) / T_N$$

$$\text{init } T_{ilcum} = 0$$

$$\text{perc}_{ra} = 100 * N_{ra} / T_{IB} ; \text{percent of blood stage infections resistant to artesunate}$$

$$\text{perc}_{rb} = 100 * N_{rb} / T_{IB} ; \text{percent of blood stage infections resistant to piperazine}$$

$$\text{perc}_{IB} = 100 * T_{IB} / T_N ; \text{percent of infections that are blood stage}$$

$$\text{init}(IT_{roda}) = 0$$

$$IT_{roda}' = B_{rodaio} + B_{rodai1a} + L_{rodaio} + L_{rodai1a} + I_{rodaio} + I_{rodai1a} + B_{rodabio} + B_{rodabi1} + B_{rodabi1a} + L_{rodabio} + L_{rodabi1} + L_{rodabi1a} + I_{rodabio} + I_{rodabi1} + I_{rodabi1a} + B_{rodabi2} + L_{rodabi2} + I_{rodabi2} + B_{rodai2} + L_{rodai2} + I_{rodai2}$$

$$\text{init}(IT_{rodb}) = 0$$

$$IT_{\text{rodb}} = B_{\text{rodbio}} + B_{\text{rodbil}} + B_{\text{rodbila}} + L_{\text{rodbio}} + L_{\text{rodbil}} + L_{\text{rodbila}} + I_{\text{rodbio}} + I_{\text{rodbil}} + I_{\text{rodbila}} + B_{\text{rodabio}} + B_{\text{rodabil}} + B_{\text{rodabila}} + L_{\text{rodabio}} + L_{\text{rodabil}} + L_{\text{rodabila}} + I_{\text{rodabio}} + I_{\text{rodabil}} + I_{\text{rodabila}} + I_{\text{rodabila}} + B_{\text{rodabi2}} + L_{\text{rodabi2}} + I_{\text{rodabi2}} + B_{\text{rodbi2}} + L_{\text{rodbi2}} + I_{\text{rodbi2}}$$

$$\text{init}(IT_{\text{rada}}) = 0$$

$$IT_{\text{rada}} = B_{\text{radaio}} + B_{\text{radaila}} + L_{\text{radaio}} + L_{\text{radaila}} + I_{\text{radaio}} + I_{\text{radaila}} + B_{\text{radabio}} + B_{\text{radabil}} + B_{\text{radabila}} + L_{\text{radabio}} + L_{\text{radabil}} + L_{\text{radabila}} + I_{\text{radabio}} + I_{\text{radabil}} + I_{\text{radabila}} + B_{\text{radabi2}} + L_{\text{radabi2}} + I_{\text{radabi2}} + B_{\text{radai2}} + L_{\text{radai2}} + I_{\text{radai2}}$$

$$\text{init}(IT_{\text{radb}}) = 0$$

$$IT_{\text{radb}} = B_{\text{radbio}} + B_{\text{radbil}} + B_{\text{radbila}} + L_{\text{radbio}} + L_{\text{radbil}} + L_{\text{radbila}} + I_{\text{radbio}} + I_{\text{radbil}} + I_{\text{radbila}} + B_{\text{radabio}} + B_{\text{radabil}} + B_{\text{radabila}} + L_{\text{radabio}} + L_{\text{radabil}} + L_{\text{radabila}} + I_{\text{radabio}} + I_{\text{radabil}} + I_{\text{radabila}} + B_{\text{radabi2}} + L_{\text{radabi2}} + I_{\text{radabi2}} + B_{\text{radbi2}} + L_{\text{radbi2}} + I_{\text{radbi2}}$$

$$\text{init}(IT_{\text{rbda}}) = 0$$

$$IT_{\text{rbda}} = B_{\text{rbdaio}} + B_{\text{rbdaila}} + L_{\text{rbdaio}} + L_{\text{rbdaila}} + I_{\text{rbdaio}} + I_{\text{rbdaila}} + B_{\text{rbdabio}} + B_{\text{rbdabil}} + B_{\text{rbdabila}} + L_{\text{rbdabio}} + L_{\text{rbdabil}} + L_{\text{rbdabila}} + I_{\text{rbdabio}} + I_{\text{rbdabil}} + I_{\text{rbdabila}} + B_{\text{rbdabi2}} + L_{\text{rbdabi2}} + I_{\text{rbdabi2}} + B_{\text{rbdai2}} + L_{\text{rbdai2}} + I_{\text{rbdai2}}$$

$$\text{init}(IT_{\text{rddb}}) = 0$$

$$IT_{\text{rddb}} = B_{\text{rddbio}} + B_{\text{rddbil}} + B_{\text{rddbila}} + L_{\text{rddbio}} + L_{\text{rddbil}} + L_{\text{rddbila}} + I_{\text{rddbio}} + I_{\text{rddbil}} + I_{\text{rddbila}} + B_{\text{rbdabio}} + B_{\text{rbdabil}} + B_{\text{rbdabila}} + L_{\text{rbdabio}} + L_{\text{rbdabil}} + L_{\text{rbdabila}} + I_{\text{rbdabio}} + I_{\text{rbdabil}} + I_{\text{rbdabila}} + B_{\text{rbdabi2}} + L_{\text{rbdabi2}} + I_{\text{rbdabi2}} + B_{\text{rdbi2}} + L_{\text{rdbi2}} + I_{\text{rdbi2}}$$
